# 1 Heterogeneous T cell motility 2 behaviors emerge from a coupling 3 between speed and turning *in vivo*

4 Elizabeth R. Jerison<sup>1</sup> and Stephen R. Quake<sup>1,2,3\*</sup>

\*For correspondence:  
[steve@quake-lab.org](mailto:steve@quake-lab.org) (FMS)

5 <sup>1</sup>Department of Applied Physics, Stanford University, Stanford, CA 94305; <sup>2</sup>Department of  
6 Bioengineering, Stanford University, Stanford, CA 94305; <sup>3</sup>Chan Zuckerberg Biohub, San  
7 Francisco, CA 94158

---

8

9 **Abstract** T cells *in vivo* migrate primarily via undirected random walks, but it remains unresolved  
10 how these random walks generate an efficient search. Here, we use light sheet microscopy of T  
11 cells in the larval zebrafish as a model system to study motility across large populations of cells  
12 over hours in their native context. We show that cell-to-cell variability is amplified by a correlation  
13 between speed and directional persistence, generating a characteristic cell behavioral manifold  
14 that is preserved under a perturbation to cell speeds, and seen in Mouse T cells and *Dictyostelium*.  
15 These results suggest that there is a single variable underlying ameboid cell motility that jointly  
16 controls speed and turning. This coupling explains behavioral heterogeneity in diverse systems and  
17 allows cells to access a broad range of length scales.

---

## 19 Introduction

20 Many immune cells migrate through tissue in search of antigen or pathogens. In some cases,  
21 such as during extravasation from blood vessels and homing to target organs, this migration is  
22 guided by chemokine gradients (*Witt et al., 2005; Okada et al., 2005; Germain et al., 2012; Sarris  
23 and Sixt, 2015*). However, for naive T cells within T cell zones, *in situ* imaging studies have found that  
24 unguided random walk processes dominate (*Miller et al., 2002, 2003; Preston et al., 2006; Cahalan  
25 and Parker, 2008; Beltman et al., 2007; Banigan et al., 2015; Harris et al., 2012; Worbs et al., 2007;  
26 Textor et al., 2011; Beauchemin et al., 2007; Mrass et al., 2006; Katakai et al., 2013; Mrass et al.,  
27 2017*), reviewed in (*Mrass et al., 2010; Krummel et al., 2016*). This observation creates a conceptual  
28 challenge: T cells must dwell at scales of microns to make contact with antigen presenting cells  
29 (*Wülfing et al., 1997; Krummel et al., 2000; Beltman et al., 2009a; Fricke et al., 2016*), yet migrate  
30 over scales of millimeters to find rare targets. A conventional diffusive random walk struggles to  
31 access these varied scales efficiently, since a walker that dwells near another cell for 1 minute  
32 would require several days to travel 1 mm. Several authors have suggested that T cells may have  
33 an intrinsic behavioral program that allows them to explore over different length scales (*Harris  
34 et al., 2012; Krummel et al., 2016; Mempel et al., 2004*). However, testing this hypothesis via *in situ*  
35 fluorescence microscopy raises inherent technical challenges: to observe a single cell accessing  
36 a broad range of spatial scales, it is necessary to have micron scale resolution over fields of view  
37 of millimeters, with low enough photodamage to observe the same cells at high spatiotemporal  
38 resolution over long periods. For example, one intriguing proposal is that T cells perform Levy  
39 flight (*Harris et al., 2012*), an anomalous random walk characterized by a power-law distribution of  
40 step sizes. Such random walks have been described in detail in the physics and ecology literature

41 (*Shlesinger et al., 1995; Bartumeus et al., 2005; Viswanathan et al., 2011*), and their scale-free  
42 behavior provides a natural way for foragers to accelerate searches in many contexts (*Bartumeus*  
43 *et al., 2002*). However, observation over short periods cannot distinguish between Levy flight and  
44 heterogeneity amongst individual walkers (*Petrovskii et al., 2011*), both of which can create a broad  
45 distribution of displacements. More generally, we would like to understand whether there is a  
46 statistically-consistent behavioral program carried out by these cells.

47 To address this question, we used selective plane illumination microscopy (*Pitrone et al., 2013;*  
48 *Power and Huisken, 2017*) to observe the native population of T cells in the live larval zebrafish  
49 (*Tg(lck:GFP, nacre<sup>-/-</sup> (Langenau et al., 2004))*), over millimeter fields of view and periods of a few  
50 hours. We observed a population of motile cells in the tail fin and larval fin fold (*Figure 1A,*  
51 *Figure 1-video 1*). We used this model system to dissect variation in cell behavior in a simple  
52 tissue context. Rather than a single broad distribution of speeds sampled by all cells, as in Levy  
53 flight, we observed considerable heterogeneity in both speed and turning behavior across cells.  
54 This observation prompted us to analyze the distribution of cell behaviors in a space defined by  
55 speed and turning statistics. Surprisingly, cell behaviors fell on a one dimensional manifold in  
56 this space, characterized by a coupling between speed and directional persistence. Analysis of  
57 previously-published data in Mouse T cells (*Gérard et al., 2014*) and *Dictyostelium* (*Dang et al., 2013*)  
58 within this framework showed that their migration statistics fell along a similar manifold. Our  
59 results suggest that a coupling between speed and turning may be an intrinsic feature of ameboid  
60 cell migration, that explains apparent heterogeneity in migration behavior in diverse systems and  
61 generates exploration at many length scales. This framework also predicts global regulation in  
62 the actin remodeling machinery underlying ameboid migration, such that diverse perturbations  
63 modulate one underlying control variable.

## 64 Results

### 65 Cell motility behavior is heterogeneous, inconsistent with Levy flight

66 To investigate the statistical properties of T cell motility in our system, we measured cell trajectories  
67 within the tissue (Materials and Methods, *Figure 1-video 1, Figure 2-video 1*). We first evaluated  
68 evidence for Levy flight behavior, as opposed to persistent random walks (*Beauchemin et al., 2007;*  
69 *Beltman et al., 2007; Banigan et al., 2015; Harris et al., 2012*), in our system. The distinction hinges  
70 on whether the statistics of individual trajectories are scale-free, so that super-diffusive behavior  
71 continues to long times; or if, alternatively, individual trajectories are diffusive at long times but  
72 there is heterogeneity across the population. To address this question, we performed a standard  
73 analysis of mean squared displacement as a function of time interval. Consistent with previous  
74 measurements (*Beauchemin et al., 2007; Beltman et al., 2007; Banigan et al., 2015; Harris et al.,*  
75 *2012*), we observed a faster-than-linear increase in MSD at early times, indicating super-diffusive  
76 behavior, with a best-fit line in surprisingly good quantitative agreement with previous observations  
77 up through 10 minutes (*Harris et al., 2012; Fricke et al., 2016 (Figure 1C)*). However, we observed a  
78 transition at the scale of minutes, consistent with persistent random walks, and inconsistent with  
79 Levy flight (also note the straight line on a linear scale, *Figure 1C inset*, characteristic of diffusive  
80 behavior). Note that while we have examined the subset of longer trajectories to measure the  
81 behavior through an additional order of magnitude in time, this result also holds when examining all  
82 trajectories through 15 minutes (*Figure 1-Figure Supplement 1*). To further test for an intermediate  
83 timescale, we computed the velocity-velocity power spectrum, using secant-approximated velocities  
84 along each trajectory (Materials and Methods). This quantity captures the timescale at which  
85 the velocities become decorrelated, if it exists; for a Levy-flight process the same negative slope  
86 is observed at all frequencies (*Viswanathan et al., 2005*), while a persistent random walk model  
87 passes towards zero slope at low frequencies (*Viswanathan et al., 2005; Pedersen et al., 2016*).  
88 Consistent with the MSD analysis, we observe two regimes, with a clear timescale on the order of  
89 minutes (*Figure 1D*). Finally, we computed the distribution of lengths between direction changes

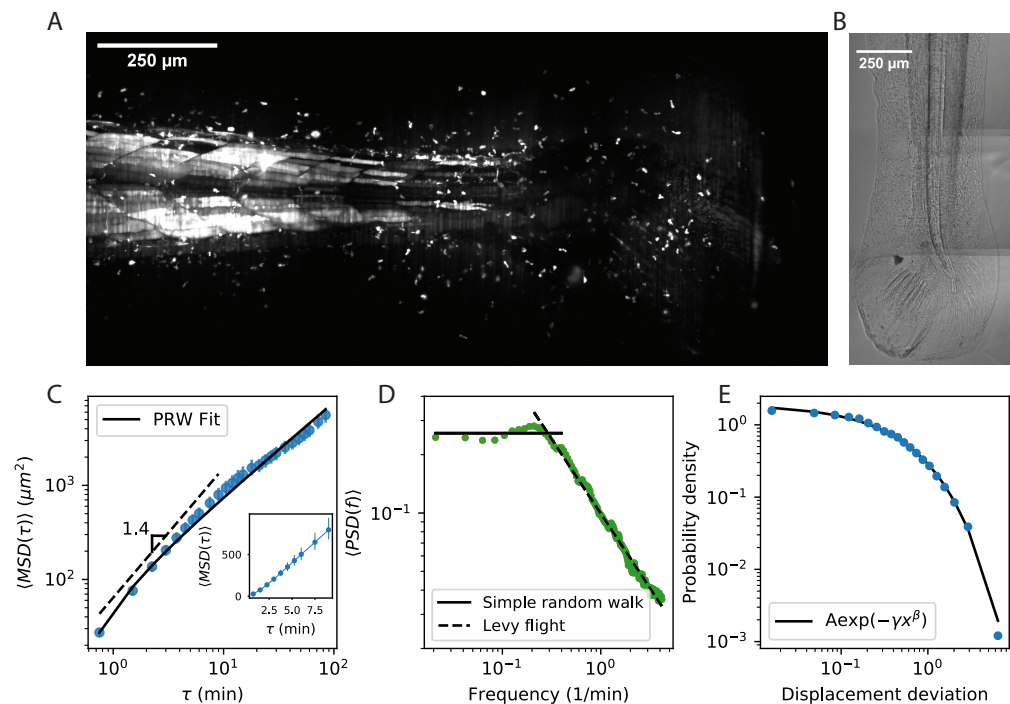

**Figure 1. Cell motility behavior is inconsistent with Levy flight.** A. Maximum Z projection of a *Tg(lck:GFP, nacre<sup>-/-</sup>)* zebrafish at 12 dpf. This projection represents the first frame of a timecourse; see **Figure 1-video 1**. B. Brightfield of the region shown in A. C. Mean squared displacement as a function of time lag. The cells migrate super-diffusively on scales of a few minutes. The MSD for a persistent random walk is fit to the data (Materials and Methods, Appendix 1). Error bars represent 95% confidence intervals on a bootstrap over  $n=335$  trajectories containing all measured time intervals. (See also **Figure Supplement 1**). Inset: linear scale for the first 10 minutes. D. The velocity power spectrum, averaged across all trajectories ( $n=634$ ). A Levy (scale-free) process consistent with the short time behavior would result in a continuation of the high frequency slope (dashed line). Instead, we observe a timescale at a few minutes. E. Distribution of bout lengths within a trajectory (Materials and Methods), fit with a stretched exponential ( $n=36190$  bouts). For all panels, trajectories were pooled from  $n=16$  fish.

**Figure 1-Figure supplement 1.** MSD for all trajectories tracked through 15 minutes.

**Figure 1-video 1. T cell dynamics in the larval zebrafish tail and fin fold** Maximum Z projection of the tail of a *Tg(lck:GFP, nacre<sup>-/-</sup>)* at 12 dpf (GFP channel). Tiled Z stacks were recorded every 45 seconds for 2.5 hours (50  $3 \mu\text{m}$  slices per stack). Tiles were assembled based on recorded stage locations. The movie was prepared using Python 3.6.0 (code available at: <https://github.com/erjerson/TCellMigration>).

90 (bout lengths) within a trajectory (Materials and Methods), scaled by the average bout length as  
91 suggested in (Petrovskii et al., 2011), and did not observe the characteristic Levy-flight power law  
92 (Figure 1E).

93 Since we did not find support for Levy flight in our system, we next evaluated evidence for cell-to-  
94 cell heterogeneity. From examples of velocity traces (Figure 2A,C-F, Figure 2-video 1), we observed  
95 substantial variation in speed between cells, that can persist over spans of a few hours. These  
96 trajectories are not atypical: overall, 88% of trajectories have distributions of secant-approximated  
97 speeds that are inconsistent with the speed distribution pooled on all trajectories (KS test,  $p < .01$ ).  
98 Interestingly, we also found significant heterogeneity in cell turning behavior: 67% of cells had turn  
99 angle distributions inconsistent with the overall distribution (KS test,  $p < .01$ ).

100 To evaluate the rate of speed switching in our system, we measured the average speeds of  
101 individual trajectories on non-overlapping 20 minute intervals, and evaluated how the speed  
102 ranks change as a function of the time between intervals (Figure 2B). We found a high correlation  
103 between speeds on adjacent non-overlapping intervals, which decays slowly on the timescale of the  
104 measurement. Thus each cell samples a characteristic distribution of speeds that is stable over one  
105 to two hours. For the remainder of the analysis, we will consider the average speed to be a property  
106 of the trajectory; we return to consider the implications of speed switching in the discussion.

### 107 **Heterogeneous cell migration statistics fall on a behavioral manifold**

108 The surprising degree of heterogeneity in random walk behavior amongst individual cells in this  
109 very simple tissue context led us to ask whether there are any underlying rules governing this  
110 variation. Are individual cells free to pick any turn and speed statistics, or are there constraints?

111 To investigate co-dependency between speed and turning behavior, we divided the cells into  
112 quintiles based on speed, which we refer to as speed classes. We observed strong variation in  
113 the distribution of turn angles amongst speed classes (Figure 3A): fast cells are most likely to turn  
114 shallowly, slow cells are most likely to turn around, and the distribution varies smoothly across the  
115 speed classes. This dependence could be driven by a local coupling between speed and turn angle:  
116 cells tend to go straighter whenever they go fast, which the faster cells do more often. Alternatively,  
117 it could be driven by an overall behavioral difference between fast and slow cells. To distinguish  
118 these possibilities, we measured the average turn angle as a function of the size of the steps  
119 surrounding it (Figure 3B). We found that both of these effects contribute: all cells go straighter  
120 during faster periods, but for a given step size, slow cells are more likely to turn sharply.

121 The relationship between speed and turning suggests that there may also be systematic dif-  
122 ferences in the scaling of the MSD at short times between cells. In particular, variation in speed  
123 alone amongst individuals would not change the shape of the MSD, which would collapse when  
124 appropriately scaled (Appendix 1). On the other hand, the systematically shallower turns of faster  
125 cells would be expected to boost the slope of their MSD at short times, an effect we observe in the  
126 data (Figure 3C).

127 The analysis at the level of speed classes suggested that there might be a single scalar variable,  
128 for which the cell's average speed is a good proxy, that determines a number of higher-order  
129 statistics characterizing the cell's migration behavior. To test this at the level of individual trajectories,  
130 we chose two summary statistics that capture the cell's turning behavior: the average of the cosine  
131 of the turn angles along the trajectory, and the correlation between speeds and turn angles along  
132 the trajectory. The former is a summary of the overall distribution of turn angles for that cell, while  
133 the latter captures the degree of additional local coupling between speed and turn angle. Together  
134 with the cell's speed, these two summary statistics form a three-dimensional behavioral space. We  
135 observed that the cell trajectories fall close to a curve in this space (Figure 3D). In particular, 73%  
136 of the variance in the average cosine can be explained by cell speed, with some residual variance  
137 due to the stochasticity of the process (7%) and other unknown effects (20%) (Figure 3-Figure  
138 Supplement 1). Thus T cell migration statistics can be organized into a one-dimensional behavioral  
139 manifold, characterized by a strong dependence between speed and turning behavior.

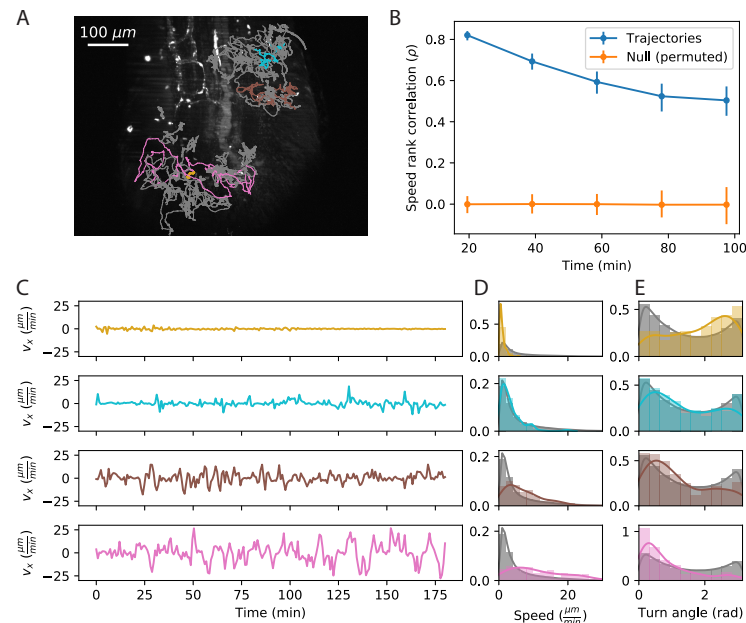

**Figure 2. Cell speed and turning behavior are heterogeneous.** A. Example of trajectories recorded over 3 hours at a 12 second interval (*Tg(lck:GFP, nacre<sup>-/-</sup>)* zebrafish; 10 dpf). Here we show a maximum Z projection of the 900th frame with trajectories overlaid; see [video 1](#) for the timecourse. Examples of four cell trajectories, with a range of characteristic speeds, are colored. B. Spearman rank correlation between trajectory speeds measured on non-overlapping 20 minute intervals, as a function of the time between the beginning of the intervals. Error bars represent 95% confidence intervals on a bootstrap over trajectories. The null model was constructed by permuting measured speeds across all the trajectories at each interval; error bars represent 95% confidence intervals over the permutations. (Calculations performed on the  $n=321$  trajectories of at least 120 minutes in length.) C. Velocity traces for the four cells highlighted in A. D. Secant-approximated speed distributions for each cell from A, compared with the distribution over all cells (grey;  $n=98141$  steps). E. Turn angle distributions for each cell from A, compared with the distribution over all cells (grey;  $n=96122$  turn angles). Trajectories were pooled over  $n=16$  fish.

**Figure 2-video 1. Heterogeneity of T cell migration** Maximum Z projection of the tail of a *Tg(lck:GFP, nacre<sup>-/-</sup>)* at 10 dpf (GFP channel), with cell trajectories overlaid. A Z stack was recorded every 12 seconds for 3 hours (62  $2 \mu\text{m}$  slices per stack). A maximum pixel value threshold of 1200 was used throughout the timecourse (no minimum pixel threshold was used). Four trajectories were chosen and highlighted in color; the remainder of the trajectories are plotted in grey. The movie was prepared using Python 3.6.0 (code available at: <https://github.com/erjerison/TCellMigration>).

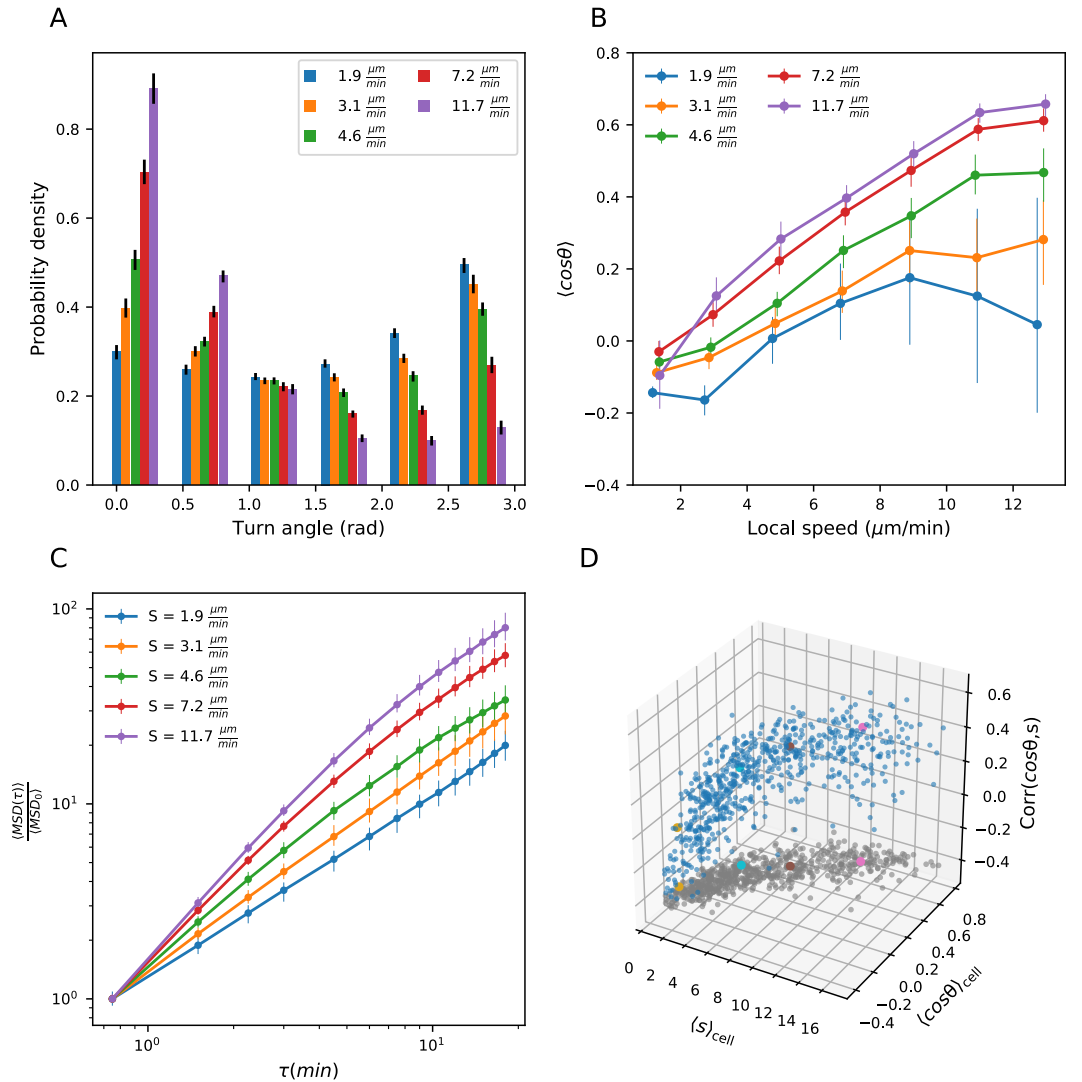

**Figure 3. Heterogeneous cell migration statistics fall on a behavioral manifold.** A. Distribution of turn angles amongst cells grouped by speed class. The distribution varies smoothly from faster cells, which tend to go straighter, to slower cells, which tend to turn around more often. Error bars represent 95% confidence intervals from a bootstrap over trajectories in each speed class. The legend reports the mean speed for trajectories in each class. B. Turning behavior conditioned on current cell speed. The average of the cosine of the turn angle as a function of the average length of the steps on either side. Cells are grouped into speed classes as in A. Error bars represent 95% confidence intervals from a bootstrap over trajectories in each speed class. C. Mean squared displacement by speed class. Due to the variation in turning behavior, the faster cells appear initially more superdiffusive. Error bars represent 95% confidence intervals from a bootstrap over trajectories in each speed class. All speed class calculations were performed on the n=569 trajectories that included all time intervals in the MSD analysis. D. Organization of cell behavior into a curve in a three dimensional behavioral space. Each point represents a trajectory, and we show the average speed, turn angle, and local speed-turn correlation. Grey: projection into the x-y plane. The trajectories shown in **Figure 2** are colored. Trajectories pooled over n=16 fish.

**Figure 3-Figure supplement 1.** Variance explained by speed-turn relationship.

140 **Model predicts wide variation in length scales of exploration across the population**

141 Our observation of a behavioral manifold suggests that, despite the apparent heterogeneity in  
142 migration strategies, there may be a common program with a single underlying variable. In this  
143 view, a cell's location on the manifold reflects its internal value of this control variable, which in turn  
144 dictates its random walk behavior. Given the results of our MSD analysis, to determine candidates  
145 for a single-parameter migration model, we started with the canonical persistent random walk  
146 (Ornstein-Uhlenbeck) process (*Uhlenbeck and Ornstein, 1930*):

$$\frac{dv_i}{dt} = -\frac{1}{P}v_i + \frac{S}{\sqrt{P}}\eta, \quad (1)$$

147 where  $v$  is the velocity,  $\eta$  is a white noise term, and  $i$  labels the velocity component. This model has  
148 two free parameters: the speed,  $S$ , and the persistence time,  $P$ , which is the average time before a cell  
149 turns. Our observations suggest that there may in fact only be one control parameter; in particular,  
150 because faster cells tend to make shallower turns, we expect  $P$  to increase with  $S$ . To determine the  
151 relationship between these two variables, we measured the persistence time, averaged along each  
152 trajectory, as a function of cell speed, and found a linear dependence (*Figure 4A*). This suggests the  
153 following simple model of cell motility:

$$\frac{dv_i}{dt} = -\frac{1}{\frac{S}{\alpha} + \beta}v_i + \frac{S}{\sqrt{\frac{S}{\alpha} + \beta}}\eta \quad (2)$$

154 where  $\alpha$  is a constant with units of acceleration,  $\beta$  is a constant with units of time, and both are  
155 constrained by the empirical relationship in *Figure 4A*. We call this the speed-persistence coupling  
156 model (SPC).

157 As in other persistent random walk models, SPC walkers are diffusive at long times; the MSD  
158 scales linearly with time, and the ratio between these quantities defines an effective diffusion  
159 constant (Appendix 1):

$$D_{eff} \equiv \frac{MSD(\tau)}{4\tau} = \frac{1}{2}S^2P. \quad (3)$$

160 Due to the dependence of  $P$  on  $S$ , the SPC model predicts a strong scaling of the effective diffusion  
161 constant with cell speed. We tested this prediction at several time intervals  $\tau$  and found good  
162 quantitative agreement between the model and the data (*Figure 4B*). In particular, the SPC model  
163 generates five-fold more variation in the effective diffusion constants across the cells than would  
164 be expected for a uniform persistence time model (UPT).

165 We note that the analyses in this and the previous section depend on measured cell speeds  
166 and turn angles, which are an imperfect proxy for the true instantaneous process (*Beltman et al.,*  
167 *2009b*). In particular, both noise in the cell locations and finite sampling intervals can introduce  
168 bias in the measured speeds, which could in principle generate spurious relationships between  
169 measured speed and turning behavior. We took two approaches to addressing the sensitivity  
170 of our conclusions to these issues. First, we addressed sensitivity to sampling rate by repeating  
171 the analyses above, subsampling timepoints by a factor of 2. This makes the turning behavior  
172 of the slowest two speed classes harder to distinguish, because they are rarely persistent over  
173 more than one timestep (*Figure 4-Figure Supplement 1A,D*), and introduces more noise in the  
174 local coupling (*Figure 4-Figure Supplement 1B*), but otherwise does not alter the structure of  
175 the correlations (*Figure 4-Figure Supplement 1A-F*). Second, we assessed the potential biases  
176 introduced by mislocation noise and finite sampling to the speed-persistence relationship in  
177 simulations (Appendix 1, Appendix 1-Figure 7). We found that mislocation noise can lead to  
178 spurious correlations between speed and persistence at the slow end of the speed spectrum, but  
179 cannot account for the consistent correlation we observe across speeds.

180 Finally, we note that the SPC Langevin model describes the effective diffusive behavior of the  
181 trajectories and their scaling at longer times, but may not capture all the details of the microscopic  
182 dynamics. In particular, the propensity of trajectories to turn backwards (peak at  $\theta = \pi$  radians,  
183 *Figure 3A*) is not captured by this model.

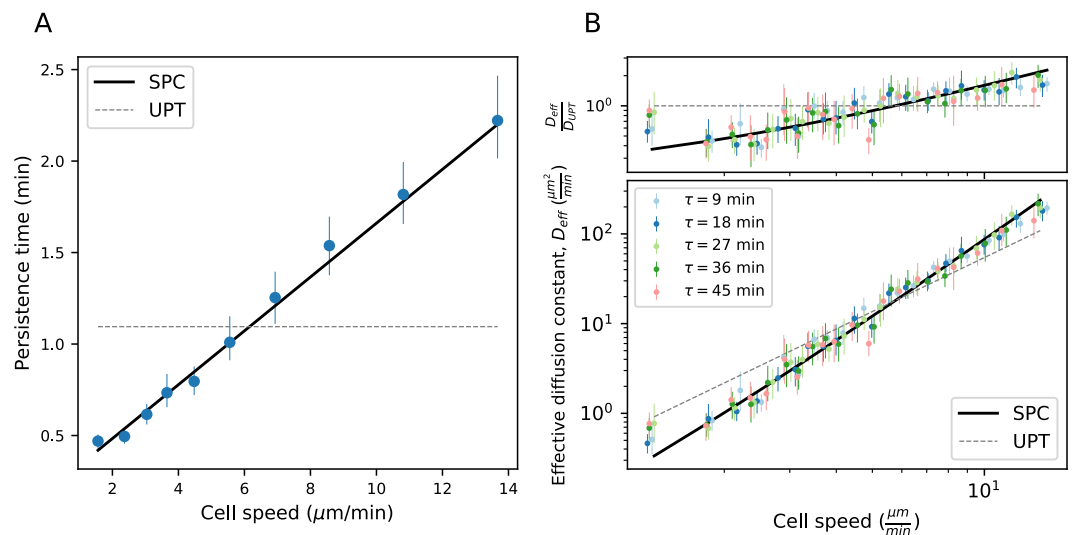

**Figure 4. Model predicts wide variation in length scales of exploration across the population.** A. Mean persistence time as a function of cell speed, measured along trajectories ( $n=710$ ). Error bars represent 95% confidence intervals from a bootstrap over trajectories. UPT: Uniform persistence time; SPC: Speed-persistence coupling. B. Scaling of the effective diffusion constant with cell speed. Except for a constant offset, parameters are fixed based on the speed-persistence relationship in A. Error bars represent 95% confidence intervals on a bootstrap over trajectories. Numbers of trajectories in each time interval:  $n=704$ ;  $n=654$ ;  $n=607$ ;  $n=558$ ;  $n=523$ . Trajectories were pooled over  $n=16$  fish.

**Figure 4-Figure supplement 1.** Statistics from Figures 3 and 4, with timepoints subsampled.

## 184 **Manifold is preserved under a drug perturbation to cell speeds**

185 We next asked about the robustness of the observed behavioral manifold under a perturbation to  
 186 cell speeds. To determine relevant pathways and candidates to perturb cell speed, we performed  
 187 single-cell RNA sequencing on cells isolated from the tail of 15 dpf Tg(*lck*:GFP) zebrafish. To assess the  
 188 fidelity of the marker, we sorted GFP+ cells from an unbiased FSC/BSC gate (Materials and Methods).  
 189 We used standard dimensional reduction and clustering methods (Materials and Methods) to  
 190 identify 351 putative T cells (Figure 5A-B). Unexpectedly, we also identified a population of epithelial  
 191 cells that may mis-express *lck* at low levels (Materials and Methods, Figure 5-Figure Supplement 1,  
 192 Figure 5-Figure Supplement 2).

193 We called marker genes for the putative T cells based on differential expression relative to the  
 194 epithelial cells (Materials and Methods). These included a number of T cell and immune markers  
 195 (Schaum et al., 2018; Moore et al., 2016; Tang et al., 2017) (Figure 3B). We note that we did not  
 196 observe significant expression of markers associated with other motile non-T immune cells (B  
 197 cells, macrophages, or neutrophils) (Schaum et al., 2018; Tang et al., 2017), and we do not find  
 198 support for NK cells (Materials and Methods, Figure 5-Figure Supplement 2, Tang et al. (2017);  
 199 Carmona et al. (2017)). The T cell associated genes also included several canonically involved in  
 200 actin nucleation and remodeling in the leukocyte cytoskeleton (Vicente-Manzanares et al., 2002;  
 201 Takenawa and Suetsugu, 2007) (WASP/ARP2/3 pathway; Figure 5B, Figure 5-Figure Supplement 2).

202 Based on these results, we chose the drug Rockout, a known Rho kinase inhibitor affecting this  
 203 pathway (Barros-Becker et al., 2017), as a candidate for perturbing cell speed, and repeated the  
 204 measurements and analysis of cell migration behavior in the presence of the drug (Materials and  
 205 Methods). We found that the distribution of cell speeds shifted downwards, but we still observed a  
 206 quantitatively similar positive relationship between speed and turning behavior (Figure 5C, D). This  
 207 is consistent with a model where the perturbation primarily shifted an internal cell state variable  
 208 that determines location along the behavioral manifold, which in turn dictates both speed and  
 209 turning behavior, although we note that there may be an additional small shift towards shallower



210 turns in the drug condition.

### 211 **Data from Mouse T cells and *Dictyostelium* also support speed-turn coupling**

212 Finally, we analyzed published data from two other species, mouse T cells *in situ* (Gérard *et al.*, 2014)  
213 and *Dictyostelium* (Dang *et al.*, 2013), in this framework. While some of the analyses that depend  
214 on longer time traces and larger cell numbers are not possible with these datasets, we tested the  
215 relationship between average turn angle and cell speed, which drives many other differences in the  
216 dynamics. We found that this correlation held amongst the control cells in both studies (Figure 6).  
217 This suggests that, as for zebrafish T cells, there is heterogeneity in speed and turning behavior  
218 amongst the cells, and is consistent with a similar behavioral manifold. In the two published studies,  
219 genetic perturbations that knocked out or down one member of the actin remodeling machinery  
220 were used: a knockout of the non-canonical myosin Myo1g in one case, and a knockout of the  
221 Arp2/3 inhibitor Arpin in the other. In each case, the perturbation had a substantial effect on the  
222 distribution of cell speeds (Figure 6, C-D). However, in both cases, a quantitatively similar positive  
223 relationship between the speed and turning behavior amongst the perturbed cells was preserved.

224 This analysis, together with the effects of the small molecule perturbation used in this study,  
225 generate the prediction that there is global coupling amongst some components of the actin  
226 remodeling machinery, so that diverse perturbations can lead to similar internal states.

### 227 **Discussion**

228 We have measured and analyzed the variability in cell motility amongst the T cells of the zebrafish  
229 tail, and used the framework generated by this analysis to examine Mouse T cells and *Dictyostelium*.  
230 We found that migration statistics from all three species fell on a similar behavioral manifold. We  
231 note that, in general, heterogeneity of motility behavior across a population could be caused by the  
232 tissue context rather than by cell-intrinsic factors. However, the effects of the drug perturbation,  
233 as well as the effects of the genetic perturbations from (Gérard *et al.*, 2014) and (Dang *et al.*,  
234 2013), support a cell-intrinsic basis for the behavioral manifold we observe here. In particular, we  
235 performed trials in which the same regions of tissue were imaged and cells tracked before and after  
236 addition of the drug (Figure 5-Figure Supplement 3); the observed changes in migration statistics  
237 must then be caused by the drug's effect on the cell's internal state, not by the tissue context.

238 Our analysis of data from Mouse T cells and *Dictyostelium* suggests that speed-persistence  
239 coupling may be a general feature of ameboid cell migration. Most surprisingly, three apparently  
240 unrelated perturbations to the actin nucleation and remodeling machinery in the three different  
241 systems all had the effect of shifting cells along, rather than off, the manifold. This suggests that  
242 perturbations to different parts of the pathway may modulate a single underlying variable, which  
243 jointly controls speed and turn distributions. This generates the hypothesis of extensive regulated  
244 coupling within this pathway, such that there are relatively few true control variables.

245 The genetic perturbations used in previous studies made the cells faster and more persistent  
246 on average (Gérard *et al.*, 2014; Dang *et al.*, 2013). Our results suggest that this connection may  
247 be general to the cells rather than specific to the perturbation. In particular, shifts in the average  
248 turning behavior have been used to argue that Arpin and Myo1g control cell steering. Our analysis  
249 suggests that increasing cell speed may in many cases increase straightness, and vice versa, so that  
250 the effect on cell steering may be indirect.

251 We have analyzed migration statistics in a framework where the average speed is a property  
252 of the trajectory. Our analysis of speed switching suggests that this is a reasonable assumption  
253 over about a 2 hour timespan (Figure 2B). We note that the moderate amount of speed switching  
254 that occurs within trajectories in our dataset may contribute to the unexplained portion of the  
255 variance in the speed-turn relationship (Figure 3-Figure Supplement 1). Our results suggest that  
256 cells maintain a location along the behavioral manifold, and hence an effective diffusion constant,  
257 over these timespans, so that there are metastable periods where cells explore at a particular  
258 length scale, before shifting to a different one. Because of the steep scaling of the effective diffusion

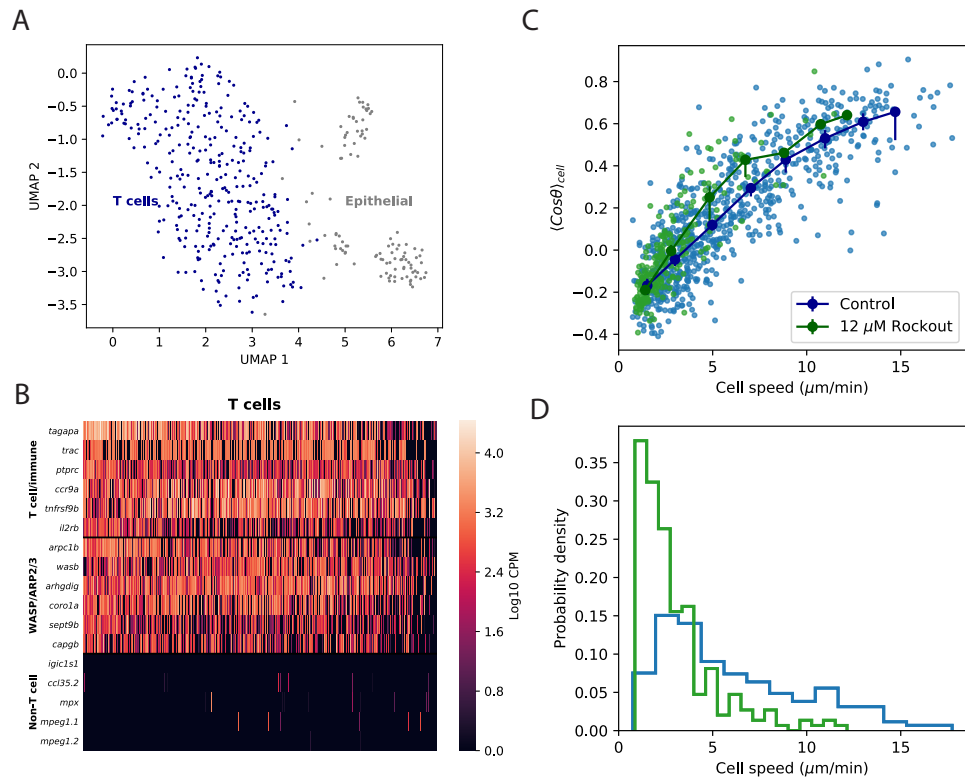

**Figure 5. Manifold is preserved under a drug perturbation to cell speeds.** A. Dimensional reduction via UMAP of scRNAseq gene expression profiles for cells sorted from 15 dpf *Tg(lck:GFP)* zebrafish. We called 351 putative T cells and 110 putative epithelial cells (Materials and Methods). B. Marker gene expression in the T cell cluster. Cells from the T cell cluster express a number of T cell and ubiquitous immune markers, including the T cell receptor light chain, *trac*, as well as genes involved in actin nucleation and remodeling. With the exception of *trac*, the genes shown in these first two categories were amongst the top 50 differentially expressed genes for the T cell cluster (Wilcoxon rank-sum test). Finally, we do not observe significant expression of immune markers associated with B cells, macrophages, or neutrophils. C. Correlation between the average cosine of the turn angles along the trajectory and cell speed, for cells in control and Rockout-treatment conditions. Data for all cells is shown as well as a binned average. Error bars represent 95% confidence intervals on the binned average on a bootstrap over cells. D. The distribution of speeds amongst control and Rockout-treated trajectories. The treatment lowers cell speeds but maintains the relationship between speed and persistence. Statistics based on trajectories pooled over  $n=16$  control fish ( $n=712$  trajectories) and  $n=6$  Rockout treatment fish ( $n=236$  trajectories). (See also [Figure Supplement 3](#).)

) **Figure 5-Figure supplement 1.** Comparison between UMAP and index sort.

**Figure 5-Figure supplement 2.** UMAP dimensional reduction as in [Figure 5](#), colored by expression of panels of genes.

**Figure 5-Figure supplement 3.** [Figure 5C-D](#), including only paired control-Rockout treatment samples.

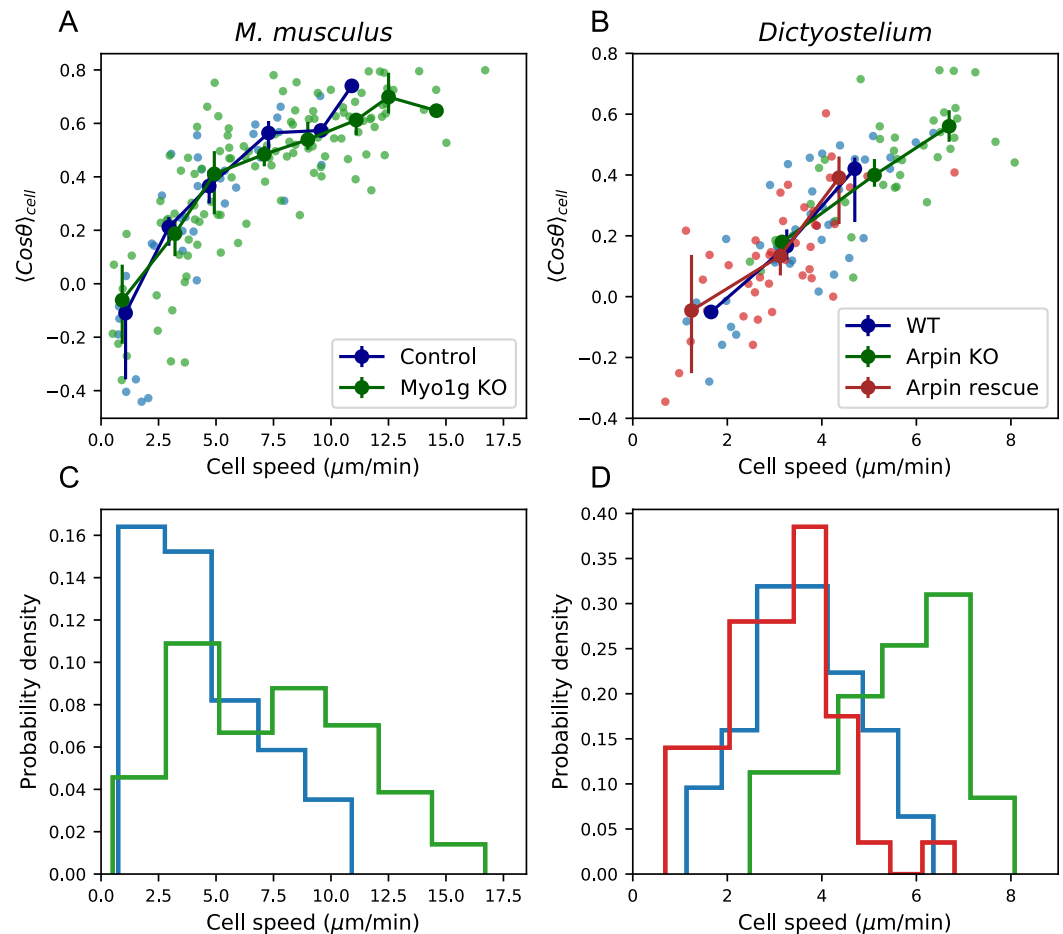

**Figure 6. Data from Mouse T cells and *Dictyostelium* also support speed-turn coupling.** A. As in 5B-C, for mouse T cells (data from (Gérard *et al.*, 2014)). The perturbation is a genetic knockout of a non-canonical myosin motor, Myo1g. B. Same as in A, for *Dictyostelium* (data from (Dang *et al.*, 2013)). The perturbations are a knockout and rescue of the Arp2/3 inhibitor Arpin. (control: n=42; Myo1g KO: n=123) C-D. Distributions of cell speeds for the control and treatment conditions shown in A-B. (WT: n=42; Arpin KO: n=38; Arpin rescue: n=42) In each case, the distribution of speeds shifts, but the cells tend to move along the speed-turn curve.

259 constant with speed, the range of length scales accessible to the cells is large, with over 300-fold  
260 variation in effective diffusion constants in our data. Thus, while our observations are inconsistent  
261 with Levy flight, the SPC model generates other ways for the cells to explore across a broad span of  
262 scales.

263 Additionally, cells sampled from different parts of the manifold have different MSD slopes at  
264 early times (**Figure 3C**), so that this single-parameter migration model produces an apparent variety  
265 of migration strategies: if measured over short intervals, the cells appear to range from more to  
266 less superdiffusive.

267 Finally, we note that speed-turn coupling could enhance a search strategy where local chemokine  
268 cues cause cells to slow down (*Dustin et al., 1997; Mempel et al., 2004; Kawakami et al., 2005;*  
269 *Castellino et al., 2006; Moreau et al., 2015*), because these signals would more efficiently shift cells  
270 between exploration scales.

## 271 Acknowledgments

272 We acknowledge Aya Ludin-Tal and Leonard Zon for the generous gift of the Tg(*lck*:GFP) zebrafish  
273 line. We acknowledge Kiran Kocherlakota and the Stanford VSC for assistance with zebrafish  
274 management and husbandry. We acknowledge Saroja Korullu for assistance with library prepara-  
275 tion. We also acknowledge Stanford Research Computing and the Sherlock2 computer cluster  
276 for computational support and resources. Finally, we acknowledge Louis Leung and Karen Mruk  
277 for invaluable advice regarding microscopy and zebrafish; Edward Marti for helpful discussions  
278 on imaging, analysis, and the manuscript, and Felix Hornes and Michael Swift for comments on  
279 the manuscript. **Funding:** This project was supported by the Chan Zuckerberg Biohub; Author  
280 contributions: E.J. and S.R.Q. designed the research; E.J. performed experiments and analysis; E.J.  
281 and S.R.Q. wrote the paper. **Competing interests:** Authors declare no competing interests. **Data**  
282 **and materials availability:** Sequencing data and the gene expression count table have been  
283 deposited on GEO (accession: GSE137770). Analysis code and trajectory data are available at  
284 <https://github.com/erjerison/TCellMigration>.

## 285 Materials and Methods

### 286 Zebrafish lines and procedures

287 Tg(*lck*:GFP, *roy*<sup>-/-</sup>, *nacre*<sup>-/-</sup>) zebrafish (*Danio rerio*) (*Langenau et al., 2004*) were obtained as a  
288 generous gift from Dr. Leonard Zon and Dr. Aya Ludin-Tal. Imaging was performed on Tg(*lck*:GFP)  
289 zebrafish crossed into a *nacre*<sup>-/-</sup> background, at between 9 and 13 dpf. All adult and larval  
290 zebrafish were maintained according to protocols approved by the Stanford Administrative Panel  
291 on Laboratory Animal Care.

### 292 Microscopy

293 Imaging was performed on a single-plane illumination microscope constructed as specified in  
294 (*Pitrone et al., 2013*), with the exception that a Prior ProScan XY stage (Prior Scientific) coupled  
295 to a Zaber T-LLS 105 stage (Zaber Technologies) was used for sample movement. The light sheet  
296 was generated using an Olympus UMPLFLN10XW objective (NA=.3) and detection was performed  
297 with an Olympus UMPLFLN20XW objective (NA=.5) and an achromatic doublet tube lens (AC508-  
298 180-A-ML, Thorlabs). Images were recored either on a Retiga 2000R camera (Qimaging) or an Ace  
299 acA2040 (Basler). For the Ace ac2040 camera, a meniscus lens (LE1418-A - O2" N-BK7, Thorlabs)  
300 was added as a zoom lens, to match the image pixel width between the two cameras at .37  $\mu\text{m}$ . The  
301 fluorescence source was an Obis LS 488 nm laser (Coherent), and the microscope was controlled by  
302 Micro-Manager.

303 Zebrafish between 9 and 13 dpf were anesthetized with Tricaine-S (MS-222, Pentaire; .008% w/v,  
304 buffered to pH 7) and embedded in 2% low melting point agarose (Lonza SeaPlaque, #50100) with  
305 .004% w/v Tricaine. For imaging, the agarose was submerged in E3 with .008% w/v Tricaine and 50

306 mM Hepes. With the exception of **Figure 2** and **Figure 2-video 1**, tiled z-stacks were obtained every  
307 45 seconds for at least 180 timepoints, with a field of view of at least 592  $\mu\text{m}$  (dorsal-ventral axis)  
308 by 1200  $\mu\text{m}$  (anterior-posterior axis). For **Figure 2A** and **Figure 2-video 1**, a z-stack was obtained  
309 every 12 seconds for 1100 timepoints, with a field of view of 757x568  $\mu\text{m}$  (the first 900 timepoints  
310 are shown). For statistical comparison with the remainder of the data, trajectories from this final  
311 dataset were subsampled in time to give 48 second timesteps. Data was acquired with 2x2 binning,  
312 for an image pixel width of .74  $\mu\text{m}$ .

313 For imaging in the presence of Rockout, embedded fish were submerged in E3 with .008% w/v  
314 Tricaine and 50 mM Hepes plus 12  $\mu\text{M}$  Rockout (Sigma Aldrich #555553). For paired control/Rockout  
315 trials, fish were imaged for 2.5 hours in control conditions, followed by 2.5 hours in Rockout  
316 conditions over the same field of view.

### 317 **Single-cell RNA sequencing**

318 Thirty 15 dpf Tg(*lck*:GFP) zebrafish were euthanized using .04% w/v Tricaine and transected posterior  
319 to the anus. Tail portions were pooled into HBSS (ThermoFisher #14025092) on ice. Tails were  
320 dissociated by incubating with 100  $\mu\text{g}/\text{mL}$  Liberase-TL (Sigma Aldrich #5401020001) at room tem-  
321 perature for 20 minutes, followed by trituration with a 23 gauge needle. The cell suspension was  
322 filtered through a 40  $\mu\text{m}$  filter and washed once in HBSS. GFP+ cells were sorted from an unbiased  
323 FSC-SSC gate on a Sony SH800 cell sorter into 384-well hard-shell PCR plates (Bio-Rad HSP3901)  
324 containing .4  $\mu\text{l}$  of lysis buffer, prepared as described previously (*Schaum et al., 2018*). Reverse  
325 transcription following a Smart-Seq2 protocol, and Illumina library preparation, were carried out  
326 as described previously (*Schaum et al., 2018*), except that following cDNA amplification, cDNA was  
327 diluted uniformly to a mean target concentration of .4  $\text{ng}/\mu\text{l}$  for library preparation. Libraries were  
328 sequenced on the NovaSeq 6000 Sequencing System (Illumina) using 2x100-bp paired-end reads.

### 329 **Image processing and cell tracking**

330 Tiles were assembled based on recorded stage coordinates and a Maximum Z projection was applied  
331 to Z stacks. Sample drift in x and y was subtracted by identifying and tracking autofluorescent  
332 pigment spots. In particular, the coordinates of 1-3 isolated pigment spots were identified manually  
333 at the first timestep; at each timestep, the brightness centroid was computed for a circle with a 25  
334 pixel radius around the previous centroid, and the average trajectory of the pixel spots was rounded  
335 to the nearest pixel and subtracted from the timeseries. Prior to cell segmentation, the average  
336 image across the whole timecourse was subtracted from each timestep. For data recorded on the  
337 Retiga 2000R camera, prior to segmentation the image was thresholded at the 30th pixel percentile  
338 and the maximum pixel value was fixed so that .4% of pixels were saturated. For data recorded on  
339 the Basler Ace acA2040 camera, no lower threshold was used and the maximum pixel value at each  
340 timepoint was fixed so that .2% of pixels were saturated. Ilastik software (*Sommer et al., 2011*) was  
341 used for cell segmentation and tracking: the Ilastik pixel classification module was used to classify  
342 foreground and background, and the manual tracking module was used to identify and track cells.  
343 To define trajectories, the brightness centroid of each cell in x and y at each timestep was computed  
344 from Ilastik tracking masks and the Maximum Z projection. Processing steps not using Ilastik were  
345 performed using Python 3.6 (code available at: <https://github.com/erjerison/TCellMigration>).

### 346 **Trajectory analysis**

347 Trajectories with at least 30 consecutive steps were included in the analysis; for MSD calculations,  
348 trajectories that included all time intervals were included. For calculations of power spectra, single  
349 missing timesteps were linearly interpolated based on the two adjacent positions, and computations  
350 were performed on the longest consecutive segment for each trajectory. For the *M. musculus* data,  
351 the time interval was 30 seconds. For the *Dictyostelium* data, timesteps were subsampled from the  
352 original to give an interval of 20 seconds.

353 Mean-squared displacements were computed along each trajectory as:

$$MSD(\tau = mt_{int}) = \frac{1}{N - m} \sum_{s=1}^{N-m} \|\vec{x}(m + s) - \vec{x}(s)\|^2, \quad (4)$$

354 where  $N$  is the total number of timesteps and  $t_{int}$  is the time interval. The overall MSD was computed  
355 by averaging the MSDs for each trajectory, and 95% confidence intervals were calculated via a  
356 bootstrap over trajectories.

357 The overall MSD was fit to:

$$MSD(\tau) = 4S^2 P\tau(1 + \frac{P}{\tau}(e^{-\frac{\tau}{P}} - 1)) + \sigma^2, \quad (5)$$

358 which we note is the common formula for mean squared displacement in both the Ornstein-  
359 Uhlenbeck model (see Appendix 1) and in the Kratky-Porod wormlike chain model. Unless otherwise  
360 noted, fitting was performed using the `scipy.optimize.curvefit` function in `scipy 1.3.0`; fitting was  
361 performed in log space and weighted by computed confidence intervals.

The velocity power spectrum was computed based on the vector of secant-approximated velocities for each trajectory. Velocity vectors were zero-padded to 400 timesteps, and the fourier transforms of the velocity components were computed using the `fft` function in `numpy (1.16.4)`. Letting the fourier-transformed velocity components for trajectory  $m$  be  $v_x(k, m)$ ,  $v_y(k, m)$ , the power spectrum for each trajectory was computed as:

$$PSD(k, m) = \frac{1}{N^2} \frac{N}{N_m} \sum_{i=x,y} (|v_i(k, m)|^2 + |v_i(N - k, m)|^2), \quad 1 < k < \frac{N}{2} \quad (6)$$

$$PSD(0, m) = \frac{1}{N^2} \frac{N}{N_m} \sum_{i=x,y} |v_i(0, m)|^2 \quad (7)$$

$$PSD(\frac{N}{2}, m) = \frac{1}{N^2} \frac{N}{N_m} \sum_{i=x,y} |v_i(\frac{N}{2}, m)|^2, \quad (8)$$

362 where  $N = 400$  and  $N_m$  is the length of trajectory  $m$ . The overall PSD was computed as the average  
363 over the PSDs for each trajectory:

$$PSD(k) = \frac{1}{n} \sum_{m=1}^n PSD(k, m), \quad (9)$$

364 where  $n$  is the number of trajectories. For **Figure 1D**, a piecewise linear function was fit to the PSD  
365 in log space; we plot the high-frequency fitted line and a line with slope 0.

366 Following (**Petrovskii et al., 2011**), we calculated the distribution of bout lengths within a tra-  
367 jectory as the distribution of x displacements between reversals in direction in x, divided by the  
368 average of these displacements within each trajectory. The distribution was calculated using the  
369 `numpy.histogram` function on percentile bins with the option `density=True`; the x locations of points  
370 were determined based on the average value of points in each bin. We fit the distribution to a  
371 stretched exponential function  $f(x) = Ae^{-\gamma x^\beta}$ ; the fitted value of the stretch parameter  $\beta$  was .65.

372 The overall speed distribution was computed by collecting secant-approximated speeds across  
373 all trajectories and timepoints; similarly, the overall turn angle distribution was computed by  
374 collecting all relative angles between consecutive segments. For the Kolmogorov-Smirnov (KS)  
375 test, the overall CDFs of speeds and turn angles were estimated by measuring the cumulative  
376 frequency over 25 percentile bins and performing linear interpolation to yield a continuous function.  
377 A two-sided KS test (`scipy.stats.kstest`) was performed for the sets of speeds and turn angles of  
378 each trajectory.

379 Turn angle distributions for each speed class were computed by collecting all relative angles  
380 between consecutive segments amongst cells in that speed class; the distributions were symmetric  
381 about  $\theta = 0$  and so were folded to be between 0 and  $\pi$  radians. 95% confidence intervals were  
382 calculated based on a bootstrap over trajectories in each speed class. For the relationship between  
383 local speed and turn angles (**Figure 2B**), the local speed was estimated as the average speed of the

384 two consecutive steps surrounding a turn. Turns were binned based on the local speed, and the  
 385 average of the cosine of the turn angles was computed for each bin. For this and other binned  
 386 statistics, the x location of the bin was fixed to be the average value for the points in that bin.

387 To estimate the rate of speed switching, all trajectories of at least 120 minutes in length were  
 388 used. The average speed of each trajectory was measured on 20 minute intervals; 20 minutes was  
 389 chosen to minimize the bias-variance trade-off. Specifically, because every cell samples speeds from  
 390 a distribution, there is trade-off between measuring speeds on intervals that are too short, which  
 391 may not give a good estimate of the mean, and intervals that are too long, where cells may switch  
 392 during the interval. To minimize this trade-off, the interval that maximized the rank correlation  
 393 between adjacent non-overlapping blocks was used. The average speed of each cell was measured  
 394 on non-overlapping intervals, and the Spearman rank correlation coefficient between all pairs of  
 395 intervals was computed. The correlation as a function of time was calculated as the average over  
 396 all pairs of intervals with the same difference in start times. We computed 95% confidence on a  
 397 bootstrap over trajectories. For the null model, we permuted speeds amongst the trajectories on  
 398 each interval; we calculated 95% confidence intervals over the permutations.

399 For **Figure 3**, the average of the cosine of turn angles between adjacent steps was calculated  
 400 for each trajectory, as well as the average over all adjacent steps of the secant approximated  
 401 speeds. For **Figure 3D**, the correlation between local speed and turns was computed as the Pearson  
 402 correlation coefficient between the local speed, as defined above, and turn angles across the set of  
 403 adjacent steps in the trajectory.

404 To estimate the fraction of the variance in turning behavior explained by the cell speed, we fit a  
 405 spline curve (UnivariateSpline class of scipy 1.3.0; default parameters) to the relationship between  
 406 speed and the average of the cosine of the turn angles (**Figure 3- Figure Supplement 1A**). Letting  
 407 the spline function be  $f$ , we estimated the variance accounted for by the speed as  $V_s = Var(f(S_m))$ ,  
 408 where the index  $m$  labels trajectories. We estimated the variance in the means due to variation  
 409 within trajectories, which we called stochasticity, as  $V_{st} = \frac{1}{n} \sum_{m=1}^n \frac{1}{k_m-1} Var_j(\cos \theta_{jm})$ , where  $n$  is the  
 410 total number of trajectories,  $k_m$  is the number of turn angles within trajectory  $m$ , and  $\cos \theta_{jm}$  is the  
 411 cosine of the turn angle  $j$  in trajectory  $m$ . Remaining variance we classified as other (**Figure 3- Figure  
 412 Supplement 1B**); this may be due to imperfections in the spline model, other experimental noise,  
 413 or additional biological variability.

414 The persistence time was defined to be the time elapsed before the trajectory turns at least  $\frac{\pi}{2}$   
 415 radians, averaged along the trajectory. Specifically, letting the displacement between timepoints  $s$   
 416 and  $s + 1$  be  $\vec{x}(s)$ , the persistence time along each trajectory was calculated as:

$$\tilde{P} = \frac{1}{n} \sum_{s=1}^n \tau(s), \quad \tau(s) = \sum_{t=s}^{m-1} t_{int} \quad (10)$$

417 where  $m > s$  is the first timestep for which  $\vec{x}(s) \cdot \vec{x}(m) < 0$ ,  $t_{int}$  is the time interval, and  $n$  is the final  
 418 base point for which  $m \leq N$ , where  $N$  is the final timepoint. For **Figure 4A**, trajectories were binned  
 419 into mean speed deciles, and the average persistence time was calculated over trajectories in the  
 420 bin; error bars represent 95% confidence intervals on a bootstrap over trajectories.

421 The effective diffusion coefficient at time  $\tau$  was measured as:

$$D_{eff}(\tau) = \frac{MSD(\tau)}{4\tau}. \quad (11)$$

422 To measure  $D_{eff}(\tau)$  as a function of  $S$ , cells were divided into speed bins (with 5% of the speed  
 423 distribution per bin);  $D_{eff}(\tau)$  for each speed bin was measured by averaging the  $D_{eff}(\tau)$  across  
 424 trajectories, and error bars were computed based on a bootstrap over all trajectories. Note that  
 425  $D_{eff}(\tau)$  will be independent of  $\tau$  only if diffusion scaling is respected, so that the collapse of the  
 426 data in **Figure 2F** is additional corroboration that the trajectories behave diffusively at long times.

427 As shown in the models section of the SI below, under the UPT model:

$$D_{eff} \propto S^2, \quad (12)$$

428 whereas under the SPC model,

$$D_{eff} \propto S^2 \left( \frac{S}{\alpha} + \beta \right), \quad (13)$$

429 where  $\alpha$  and  $\beta$  are fixed across all trajectories. We fixed  $\alpha$  and  $\beta$  by fitting a line to the persistence  
430 time relationship in **Figure 1C**; note that this is a short-time statistic and need not a priori predict  
431 the effective diffusion constant at longer times. We fit the UPT model (dashed line) and the SPC  
432 model (solid) to the measured  $D_{eff}$  as a function of  $S$ ; in both cases, there was one fitting parameter  
433 which was the constant of proportionality, which allows for an offset on the y-axis in log space but  
434 does not change the shape of the curve.

### 435 **Analysis of scRNAseq data**

436 Reads were aligned to the Zebrafish reference genome (genome release: GRCz10; annotations:  
437 GRCz10.85) using STAR (2.5); reads aligned to each gene were counted using the htseq-count  
438 function of HTseq (0.8.0), with the options -m intersection-nonempty and -nonunique all. Note  
439 that the final option counts reads that align to a location with more than one annotated feature  
440 (e.g. overlapping ORFs) as belonging to both features. This is necessary because of mis-annotation  
441 of the T cell receptor light chain constant region in the Zebrafish reference genome; both ENS-  
442 DARG00000075807 (*traj39*) and ENSDARG00000104132 (*traj28*) contain the *trac*, so that reads  
443 mapping to *trac* would otherwise be discarded.

444 Cells were filtered if they expressed fewer than 650 genes or more than 3250 genes, and if  
445 more than 8% of reads were of mitochondrial origin. We used UMAP (0.3.1) with the default  
446 options to embed the log-transformed counts table in two dimensions, and HDBSCAN (0.8.22)  
447 with min\_samples=10 to call clusters (**Figure 5-Figure Supplement 1A**). Comparison with the index  
448 sort data (**Figure 5-Figure Supplement 1B**) showed that cells from the largest cluster had FSC-BSC  
449 consistent with lymphocytes, whereas cells from other clusters tended to have higher FSC and BSC.  
450 We called the major cluster as the first cell group and other clusters as the second group; the n=23  
451 cells that were not assigned to a cluster by HDBSCAN were included with the first group if they had  
452 BSC <  $8 \times 10^4$ , and with the second group otherwise. We identified differentially expressed genes  
453 between the two groups via a Wilcoxon Rank-Sum test. We selected the 50 most differentially-  
454 expressed genes (lowest Wilcoxon p-value) that were enriched in the T cell group for further analysis.  
455 These included the T cell and immune-related genes *tagapa*, *tagapb*, *ccr9a*, *tnfrs9b*, *il2rb*, and *ptprc*  
456 (**Schaum et al., 2018**); we also tested for expression of the T cell receptor light chain constant  
457 region (*trac*; expression estimated based on the mean expression of ENSDARG00000075807 and  
458 ENSDARG00000104132). Based on these markers, we identified the larger group (n=351) as T cells,  
459 and show expression for these cells in **Figure 5B**. The 50 most significantly differentially expressed  
460 genes enriched in this group also included *arpc1b*, *wasb*, *arghdig*, *coro1a*, *sept9b*, and *capgb*, which we  
461 classified as belonging to the WASP/ARP2/3 pathway based on the literature (**Vicente-Manzanares**  
462 **et al., 2002**). Finally, we observed very little expression of markers associated with other types  
463 of immune cells (the B cell light chain *igc1s*, the B cell marker *ccl35.2*, and the neutrophil and  
464 macrophage markers *mpeg1* and *mpx* (**Tang et al., 2017**) in either group (**Figure 5B, Figure 5-Figure**  
465 **Supplement 2**). The genes most significantly enriched in the non-T cell group are primarily keratin  
466 proteins (*krt8*, *KRT1*), as well as the epithelial marker *ahnak* (**Schaum et al., 2018**) (**Figure 5-**  
467 **Figure Supplement 2**). We identified these cells as epithelial cells, likely keratinocytes. We note  
468 that we observed GFP signal in the somite region of the Tg(*lck*:GFP) tail via microscopy (see, e.g.,  
469 **Figure 1A** and Movie S1) which we did not observe in wildtype *nacre*<sup>-/-</sup> zebrafish, suggesting that  
470 these cells may mis-express the marker.

471 Finally, we note that we observe a sub-cluster of T cells that are enriched for expression of  
472 *ccl38a.5*, *ccl38.6*, and *zbtb32*, and also have somewhat higher expression of *scin1b* (**Figure 5-Figure**  
473 **Supplement 2**). This is consistent with a subpopulation of cells previously identified in Tg(*lck*:GFP)  
474 zebrafish (**Tang et al., 2017**). These cells were previously identified as NK cells; however, since they  
475 express the T cell receptor light chain, they are likely to be a T cell subset.



## 476 **Data and Code Availability**

477 Sequencing data and the gene expression count table have been deposited on GEO (accession:  
478 GSE137770). Analysis code and trajectory data are available at <https://github.com/erjerison/TCellMigration>.

## 479 **References**

- 480 **Banigan EJ**, Harris TH, Christian DA, Hunter CA, Liu AJ. Heterogeneous CD8+ T cell migration in the lymph node  
481 in the absence of inflammation revealed by quantitative migration analysis. *PLoS computational biology*.  
482 2015; 11(2):e1004058.
- 483 **Barros-Becker F**, Lam PY, Fisher R, Huttenlocher A. Live imaging reveals distinct modes of neutrophil and  
484 macrophage migration within interstitial tissues. *J Cell Sci*. 2017; 130(22):3801–3808.
- 485 **Bartumeus F**, Catalan J, Fulco U, Lyra M, Viswanathan G. Optimizing the encounter rate in biological interactions:  
486 Lévy versus Brownian strategies. *Physical Review Letters*. 2002; 88(9):097901.
- 487 **Bartumeus F**, da Luz MGE, Viswanathan GM, Catalan J. Animal search strategies: a quantitative random-walk  
488 analysis. *Ecology*. 2005; 86(11):3078–3087.
- 489 **Beauchemin C**, Dixit NM, Perelson AS. Characterizing T cell movement within lymph nodes in the absence of  
490 antigen. *The Journal of Immunology*. 2007; 178(9):5505–5512.
- 491 **Beltman JB**, Henrickson SE, von Andrian UH, de Boer RJ, Marée AF. Towards estimating the true duration of  
492 dendritic cell interactions with T cells. *Journal of immunological methods*. 2009; 347(1-2):54–69.
- 493 **Beltman JB**, Marée AF, De Boer RJ. Analysing immune cell migration. *Nature Reviews Immunology*. 2009;  
494 9(11):789.
- 495 **Beltman JB**, Marée AF, Lynch JN, Miller MJ, de Boer RJ. Lymph node topology dictates T cell migration behavior.  
496 *Journal of Experimental Medicine*. 2007; 204(4):771–780.
- 497 **Cahalan MD**, Parker I. Choreography of cell motility and interaction dynamics imaged by two-photon microscopy  
498 in lymphoid organs. *Annu Rev Immunol*. 2008; 26:585–626.
- 499 **Carmona SJ**, Teichmann SA, Ferreira L, Macaulay IC, Stubbington MJ, Cvejic A, Gfeller D. Single-cell transcriptome  
500 analysis of fish immune cells provides insight into the evolution of vertebrate immune cell types. *Genome*  
501 *research*. 2017; 27(3):451–461.
- 502 **Castellino F**, Huang AY, Altan-Bonnet G, Stoll S, Scheinecker C, Germain RN. Chemokines enhance immunity by  
503 guiding naive CD8+ T cells to sites of CD4+ T cell–dendritic cell interaction. *Nature*. 2006; 440(7086):890.
- 504 **Dang I**, Gorelik R, Sousa-Blin C, Derivery E, Guérin C, Linkner J, Nemethova M, Dumortier JG, Giger FA, Chipysheva  
505 TA, et al. Inhibitory signalling to the Arp2/3 complex steers cell migration. *Nature*. 2013; 503(7475):281.
- 506 **Doi M**, Edwards SF. *The theory of polymer dynamics*, vol. 73. oxford university press; 1988.
- 507 **Dustin ML**, Bromley SK, Kan Z, Peterson DA, Unanue ER. Antigen receptor engagement delivers a stop signal to  
508 migrating T lymphocytes. *Proceedings of the National Academy of Sciences*. 1997; 94(8):3909–3913.
- 509 **Fricke GM**, Letendre KA, Moses ME, Cannon JL. Persistence and adaptation in immunity: T cells balance the  
510 extent and thoroughness of search. *PLoS computational biology*. 2016; 12(3):e1004818.
- 511 **Gérard A**, Patino-Lopez G, Beemiller P, Nambiar R, Ben-Aissa K, Liu Y, Totah FJ, Tyska MJ, Shaw S, Krummel MF.  
512 Detection of rare antigen-presenting cells through T cell-intrinsic meandering motility, mediated by Myo1g.  
513 *Cell*. 2014; 158(3):492–505.
- 514 **Germain RN**, Robey EA, Cahalan MD. A decade of imaging cellular motility and interaction dynamics in the  
515 immune system. *Science*. 2012; 336(6089):1676–1681.
- 516 **Gillespie DT**. Exact numerical simulation of the Ornstein-Uhlenbeck process and its integral. *Physical review E*.  
517 1996; 54(2):2084.
- 518 **Harris TH**, Banigan EJ, Christian DA, Konradt C, Wojno EDT, Norose K, Wilson EH, John B, Weninger W, Luster AD,  
519 et al. Generalized Lévy walks and the role of chemokines in migration of effector CD8+ T cells. *Nature*. 2012;  
520 486(7404):545.

- 521 **Katakai T**, Habiro K, Kinashi T. Dendritic cells regulate high-speed interstitial T cell migration in the lymph node  
522 via LFA-1/ICAM-1. *The Journal of Immunology*. 2013; 191(3):1188–1199.
- 523 **Kawakami N**, Nägerl UV, Odoardi F, Bonhoeffer T, Wekerle H, Flügel A. Live imaging of effector cell trafficking and  
524 autoantigen recognition within the unfolding autoimmune encephalomyelitis lesion. *Journal of Experimental*  
525 *Medicine*. 2005; 201(11):1805–1814.
- 526 **Krummel MF**, Bartumeus F, Gérard A. T cell migration, search strategies and mechanisms. *Nature Reviews*  
527 *Immunology*. 2016; 16(3):193.
- 528 **Krummel MF**, Sjaastad MD, Wülfing C, Davis MM. Differential clustering of CD4 and CD3 $\zeta$  during T cell  
529 recognition. *Science*. 2000; 289(5483):1349–1352.
- 530 **Langenau DM**, Ferrando AA, Traver D, Kutok JL, Hezel JPD, Kanki JP, Zon LI, Look AT, Trede NS. In vivo tracking of  
531 T cell development, ablation, and engraftment in transgenic zebrafish. *Proceedings of the National Academy*  
532 *of Sciences*. 2004; 101(19):7369–7374.
- 533 **Mempel TR**, Henrickson SE, Von Andrian UH. T-cell priming by dendritic cells in lymph nodes occurs in three  
534 distinct phases. *Nature*. 2004; 427(6970):154.
- 535 **Miller MJ**, Wei SH, Cahalan MD, Parker I. Autonomous T cell trafficking examined in vivo with intravital two-  
536 photon microscopy. *Proceedings of the National Academy of Sciences*. 2003; 100(5):2604–2609.
- 537 **Miller MJ**, Wei SH, Parker I, Cahalan MD. Two-photon imaging of lymphocyte motility and antigen response in  
538 intact lymph node. *Science*. 2002; 296(5574):1869–1873.
- 539 **Moore FE**, Garcia EG, Lobbardi R, Jain E, Tang Q, Moore JC, Cortes M, Molodtsov A, Kasheta M, Luo CC, et al.  
540 Single-cell transcriptional analysis of normal, aberrant, and malignant hematopoiesis in zebrafish. *Journal of*  
541 *Experimental Medicine*. 2016; 213(6):979–992.
- 542 **Moreau HD**, Lemaître F, Garrod KR, Garcia Z, Lennon-Duménil AM, Bousso P. Signal strength regulates antigen-  
543 mediated T-cell deceleration by distinct mechanisms to promote local exploration or arrest. *Proceedings of*  
544 *the National Academy of Sciences*. 2015; 112(39):12151–12156.
- 545 **Mrass P**, Oruganti SR, Fricke GM, Tafoya J, Byrum JR, Yang L, Hamilton SL, Miller MJ, Moses ME, Cannon JL. ROCK  
546 regulates the intermittent mode of interstitial T cell migration in inflamed lungs. *Nature communications*.  
547 2017; 8(1):1010.
- 548 **Mrass P**, Petravic J, Davenport MP, Weninger W. Cell-autonomous and environmental contributions to the  
549 interstitial migration of T cells. In: *Seminars in immunopathology*, vol. 32 Springer; 2010. p. 257–274.
- 550 **Mrass P**, Takano H, Ng LG, Daxini S, Lasaro MO, Iparraguirre A, Cavanagh LL, von Andrian UH, Ertl HC, Haydon  
551 PG, et al. Random migration precedes stable target cell interactions of tumor-infiltrating T cells. *Journal of*  
552 *Experimental Medicine*. 2006; 203(12):2749–2761.
- 553 **Okada T**, Miller MJ, Parker I, Krummel MF, Neighbors M, Hartley SB, O'Garra A, Cahalan MD, Cyster JG. Antigen-  
554 engaged B cells undergo chemotaxis toward the T zone and form motile conjugates with helper T cells. *PLoS*  
555 *biology*. 2005; 3(6):e150.
- 556 **Pedersen JN**, Li L, Grädinaru C, Austin RH, Cox EC, Flyvbjerg H. How to connect time-lapse recorded trajectories  
557 of motile microorganisms with dynamical models in continuous time. *Physical Review E*. 2016; 94(6):062401.
- 558 **Petrovskii S**, Mashanova A, Jansen VA. Variation in individual walking behavior creates the impression of a Lévy  
559 flight. *Proceedings of the National Academy of Sciences*. 2011; 108(21):8704–8707.
- 560 **Pitrone PG**, Schindelin J, Stuyvenberg L, Preibisch S, Weber M, Eliceiri KW, Huisken J, Tomancak P. OpenSPIM: an  
561 open-access light-sheet microscopy platform. *nature methods*. 2013; 10(7):598.
- 562 **Power RM**, Huisken J. A guide to light-sheet fluorescence microscopy for multiscale imaging. *Nature methods*.  
563 2017; 14(4):360.
- 564 **Preston S**, Waters S, Jensen O, Heaton P, Pritchard D. T-cell motility in the early stages of the immune response  
565 modeled as a random walk amongst targets. *Physical Review E*. 2006; 74(1):011910.
- 566 **Sarris M**, Sixt M. Navigating in tissue mazes: chemoattractant interpretation in complex environments. *Current*  
567 *opinion in cell biology*. 2015; 36:93–102.

- 568 **Schaum N**, Karkanas J, Neff NF, May AP, Quake SR, Wyss-Coray T, Darmanis S, Batson J, Botvinnik O, Chen MB,  
569 et al. Single-cell transcriptomics of 20 mouse organs creates a Tabula Muris: The Tabula Muris Consortium.  
570 *Nature*. 2018; 562(7727):367.
- 571 **Shlesinger MF**, Zaslavsky GM, Frisch U. Lévy flights and related topics in physics. . 1995; .
- 572 **Sommer C**, Straehle C, Koethe U, Hamprecht FA. Ilastik: Interactive learning and segmentation toolkit. In:  
573 *Biomedical Imaging: From Nano to Macro, 2011 IEEE International Symposium on IEEE*; 2011. p. 230–233.
- 574 **Takenawa T**, Suetsugu S. The WASP-WAVE protein network: connecting the membrane to the cytoskeleton.  
575 *Nature reviews Molecular cell biology*. 2007; 8(1):37.
- 576 **Tang Q**, Iyer S, Lobbardi R, Moore JC, Chen H, Lareau C, Hebert C, Shaw ML, Neftel C, Suva ML, et al. Dissecting  
577 hematopoietic and renal cell heterogeneity in adult zebrafish at single-cell resolution using RNA sequencing.  
578 *Journal of Experimental Medicine*. 2017; 214(10):2875–2887.
- 579 **Textor J**, Peixoto A, Henrickson SE, Sinn M, von Andrian UH, Westermann J. Defining the quantitative limits  
580 of intravital two-photon lymphocyte tracking. *Proceedings of the National Academy of Sciences*. 2011;  
581 108(30):12401–12406.
- 582 **Uhlenbeck GE**, Ornstein LS. On the theory of the Brownian motion. *Physical review*. 1930; 36(5):823.
- 583 **Vicente-Manzanares M**, Sancho D, Yáñez-Mó M, Sánchez-Madrid F. The leukocyte cytoskeleton in cell migration  
584 and immune interactions. In: *International review of cytology*, vol. 216 Elsevier; 2002.p. 233–289.
- 585 **Viswanathan GM**, Da Luz MG, Raposo EP, Stanley HE. The physics of foraging: an introduction to random  
586 searches and biological encounters. Cambridge University Press; 2011.
- 587 **Viswanathan G**, Raposo E, Bartumeus F, Catalan J, Da Luz M. Necessary criterion for distinguishing true  
588 superdiffusion from correlated random walk processes. *Physical Review E*. 2005; 72(1):011111.
- 589 **Witt CM**, Raychaudhuri S, Schaefer B, Chakraborty AK, Robey EA. Directed migration of positively selected  
590 thymocytes visualized in real time. *PLoS biology*. 2005; 3(6):e160.
- 591 **Worbs T**, Mempel TR, Bölter J, von Andrian UH, Förster R. CCR7 ligands stimulate the intranodal motility of T  
592 lymphocytes in vivo. *Journal of Experimental Medicine*. 2007; 204(3):489–495.
- 593 **Wu PH**, Giri A, Sun SX, Wirtz D. Three-dimensional cell migration does not follow a random walk. *Proceedings of*  
594 *the National Academy of Sciences*. 2014; 111(11):3949–3954.
- 595 **Wülfing C**, Rabinowitz JD, Beeson C, Sjaastad MD, McConnell HM, Davis MM. Kinetics and extent of T cell  
596 activation as measured with the calcium signal. *Journal of Experimental Medicine*. 1997; 185(10):1815–1825.

## 597 **Appendix 1**

### 598 **Persistent random walks: the uniform persistence time (UPT) and the speed-persistence** 599 **coupling (SPC) models**

600 The infinitesimal model most commonly used to describe metazoan cell migration is the Ornstein-  
601 Uhlenbeck model (OU) (**Uhlenbeck and Ornstein, 1930**), which has also been called the persistent  
602 random walk model (PRW) in the context of cell migration (**Wu et al., 2014**). While we have chosen  
603 this model for concreteness, the statistical features discussed below are also in common to a  
604 number of other models that include some directional persistence but are diffusive at long times,  
605 including the Kratky-Porod wormlike chain model (**Doi and Edwards, 1988**). We briefly review some  
606 of the standard results which we use to compare to data below.

607 Under the OU model, the dynamics of a cell are described by:

$$\frac{dv_i(t)}{dt} = -\frac{1}{P}v_i(t)dt + \frac{S}{\sqrt{P}}\eta_t, \quad (14)$$

608 where  $S$  is the speed parameter;  $P$  is the persistence time parameter;  $\eta_t$  is a Gaussian white noise  
609 term; and  $i = x, y, z$ . This model, considered the prototypical noisy relaxation process, produces two  
610 main qualitative features: trajectories that turn smoothly (i.e. directional persistence), and diffusive

611 behavior at times  $t \gg P$ . We note that fluctuations in velocity and speed along the trajectory are  
 612 also features of this model. In particular, the velocity-velocity autocorrelation function is given by:

$$\langle v_i(t)v_i(s) \rangle = S^2 e^{-\frac{|t-s|}{P}}. \quad (15)$$

613 Setting  $t = s$ , we see that the speed parameter  $S$  is proportional to the root-mean squared speed:  
 614  $S = \sqrt{\langle \frac{1}{n} \sum_i v_i(t)^2 \rangle}$ , where  $n$  is the number of dimensions. Because the distribution of velocities  
 615 generated by the model is Gaussian,  $S$  is also proportional to the mean speed. The decay of  
 616 the velocity autocorrelation in each component sets the turning timescale at  $P$ ; at long times the  
 617 directions of motion are uncorrelated.

618 The mean-squared displacement (MSD) after a time interval  $\tau$  is given by:

$$\langle (\vec{x}(\tau) - \vec{x}(0))^2 \rangle = 2nS^2P\tau(1 + \frac{P}{\tau}(e^{-\frac{\tau}{P}} - 1)), \quad (16)$$

619 where  $n$  is the number of dimensions. The MSD scales advectively, as  $nS^2\tau^2$ , in the limit of  $\tau \ll P$ ,  
 620 and diffusively, as  $2nS^2P\tau$ , in the limit of  $\tau \gg P$ . Thus the model predicts that  $\frac{\langle (\vec{x}(\tau) - \vec{x}(0))^2 \rangle}{\tau}$  will approach  
 621 a constant value of  $2nS^2P$  at long times, which defines the effective diffusion constant to be  $\frac{1}{2}S^2P$ .

622 We refer to the OU model with fixed persistence time parameter  $P$  (but potentially variable speed  
 623 parameters  $S$ ) as the uniform persistence time (UPT) model. We note that under the OU model, the  
 624 MSD and PSD depend on the speed parameter  $S$  only through the constant scale factor  $S^2$ : for fixed  
 625  $P$ , the quantities  $\frac{\langle (\vec{x}(\tau) - \vec{x}(0))^2 \rangle}{S^2}$  and  $\frac{\langle v_i(f)^2 \rangle}{S^2}$  are independent of speed, as are the normalized quantities  
 626  $\frac{\langle (\vec{x}(\tau) - \vec{x}(0))^2 \rangle}{\langle (\vec{x}(\tau_0) - \vec{x}(0))^2 \rangle}$  and  $\frac{\langle v_i(f)^2 \rangle}{\langle v_i(f_0)^2 \rangle}$ , where  $\tau_0$  and  $f_0$  are a chosen time interval and frequency, respectively. (Note  
 627 that this is also true of the full dynamics: we can eliminate the dependence on  $S$  by transforming  
 628 to the variable  $\tilde{v} = \frac{v}{S}$ , or measuring distance in units proportional to  $S$ .) In particular, the effective  
 629 diffusion constant  $D_{eff} = \frac{1}{2}S^2P$  scales with  $S^2$ .

630 Our observation of a linear relationship between measured mean speeds and correlation  
 631 times suggests the following constrained form of the OU model, which we have called the speed-  
 632 persistence coupling (SPC) model:

$$\frac{dv_i(t)}{dt} = -\frac{1}{\frac{S}{\alpha} + \beta} v_i(t) + \frac{S}{\sqrt{\frac{S}{\alpha} + \beta}} \eta_i, \quad (17)$$

633 where  $\alpha$  is a constant with units of acceleration;  $\beta$  is a constant with units of time; and both are  
 634 fixed across all cells.

635 In this model, the effective diffusion constant is:

$$D_{eff} = \frac{1}{2}S^2(\frac{S}{\alpha} + \beta). \quad (18)$$

636 Under the SPC model, the control parameter  $S$  is proportional to the cell's mean speed, so that  
 637 this observable fully specifies its dynamics.

638 Finally, we note that with fixed  $S$  and  $P$ , these models still produce variation in both local speed  
 639 and turning behavior along trajectories; the control parameters, together with Equation 14, set the  
 640 distributions of these quantities.

## 641 **Effects of finite-length trajectories, sampling intervals, noise, and distributions of** 642 **persistence time on speed-persistence coupling**

643 Measurements of speed and persistence time are imperfect estimators of the underlying continuous  
 644 process. Here we address whether statistical artifacts could generate the observed correlations  
 645 between speed and persistence time. In particular, the finite sampling interval introduces a bias  
 646 downwards in all speed estimates, because some turns are missed. Because this effect is stronger  
 647 for less-persistent cells, which turn more, we expect it to introduce a correlation between the  
 648 measured speed and the measured persistence time.

649 To evaluate the influence that this may have had on our data, we simulated a collection of cells  
650 with the same speeds as our measured cells under the OU model. Simulations were performed  
651 using the velocity update rule in Equation 14 (Gillespie, 1996), with 20 simulated intervals  $dt$  per  
652 sampling interval. Position coordinates were determined by numerical integration of the velocities  
653 along the simulated trajectories. Noise in centroid locations was included by adding a Gaussian  
654 random variable to  $x$  and  $y$  positions. We conservatively set the noise parameter at  $\sigma = 3 \mu m$   
655 per sampling interval; this was chosen as an estimate of the combined effects of true technical  
656 noise and changes in cell shape during the interval. Each simulated trajectory was 50 sampling  
657 intervals (1000 microscopic timesteps) in length. To match the measurement, sampling intervals  
658 were assigned to be 45 seconds in length. We measured both mean speeds and correlation times  
659 on the simulated trajectories as defined in Materials and Methods.

660 We first assessed whether the SPC model, defined in the previous section, with the addition of  
661 noise in the centroid locations, gave the expected dependence of measured persistence time on  
662 measured cell speed (Figure 7B). Next, we simulated a collection of cells with the same set of speeds  
663 as in the data, with a constant persistence time parameter  $P$  (the UPT model), to check whether the  
664 finite length of the trajectories induced a correlation between measured speeds and persistence  
665 times (Figure 7C). We did not observe a significant effect. Next, we added centroid location noise  
666 to the UPT model. The addition of noise does induce a correlation at the slow end of the speed  
667 spectrum (Figure 7D); this is because cells that happen to have turned more will appear slower.  
668 However, this effect becomes negligible for cells with speeds above the noise level. We note that  
669 this likely contributes to the measured propensity for sharp turns amongst the slowest cells, and  
670 may lead to misassignment between the two lowest speed classes.

671 We next evaluated whether a model where both  $S$  and  $P$  varied in a manner consistent with the  
672 data, but were uncorrelated with each other, could induce a correlation between measured speed  
673 and persistence time. Such a correlation could appear on the faster end of the speed spectrum  
674 due to variable  $P$ , because the fastest measured cells are biased to having been both fast and  
675 particularly persistent. We evaluated the size of this effect in our data by simulating a collection  
676 of cells with the observed speed distribution, as before, permuting the predicted  $P$  parameters  
677 from the SPC model amongst the simulated cells. We found that this did not measurably bias the  
678 speed-persistence relationship (Figure 7E). Finally, we simulated the uncorrelated  $S$  and  $P$  model  
679 with the addition of centroid location noise (Figure 7F).

680 From this analysis, we concluded that noise in the locations creates a spurious correlation  
681 between measured speed and measured persistence time at the slow end of the speed spectrum,  
682 but that this effect cannot account for the consistent correlation across speeds that we observe; and  
683 that a model with variable  $P$  that is uncorrelated with  $S$  also cannot account for our observations.

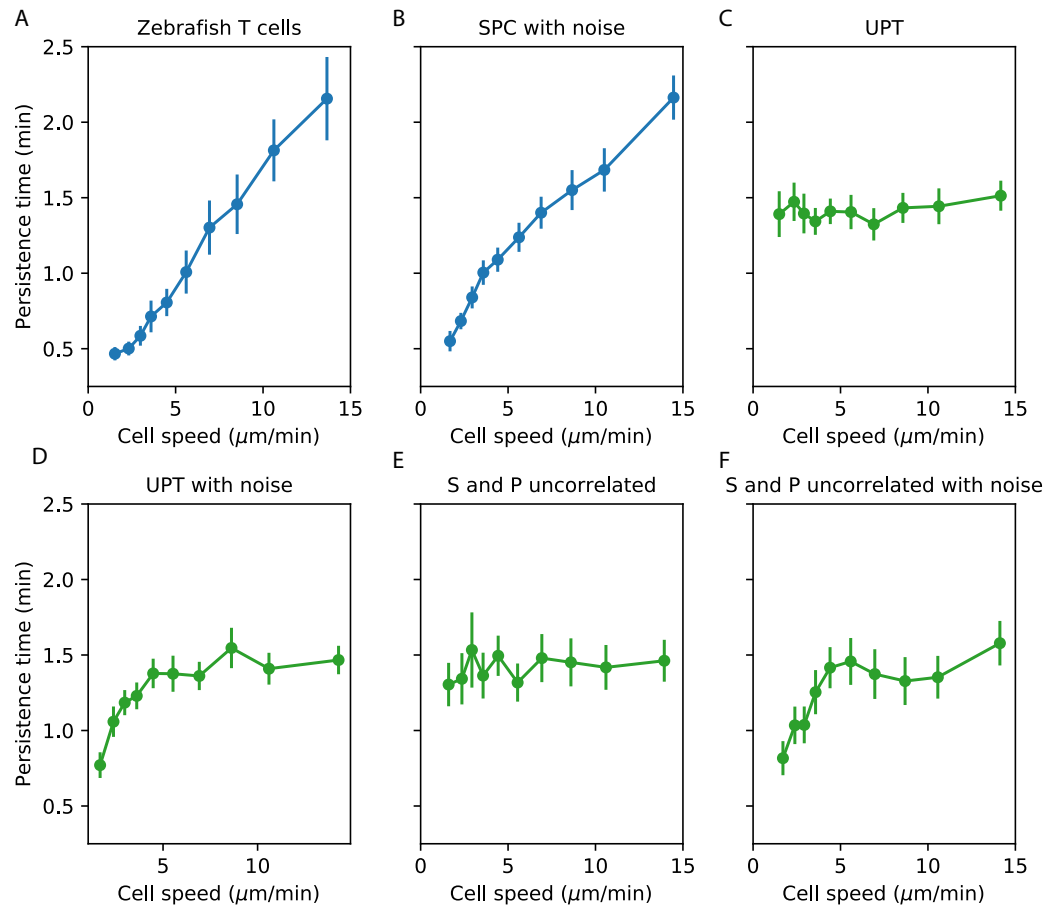

**Figure 7.** Comparisons between speed-persistence time relationship in simulations and data. A. Data (as in *Figure 4A*). B. Simulation of the SPC model with empirical parameters (see Appendix 1 for details). C. Simulation of uniform persistence time (UPT) model, with speeds and persistence times measured as in the data. Biases introduced by measured speeds and persistence times do not lead to an observable correlation. D. Simulation of UPT model with a conservative estimate of mislocation noise. A spurious correlation is induced at low cell speeds, but cannot account for the trend across cell speeds that we observe. E. Simulation of a model where the predicted persistence times have been reshuffled amongst the cells, to simulate an empirically-realistic model where persistence times vary but are uncorrelated with speed. This does not generate a significant bias in the speed-persistence relationship. F. Model with reshuffled persistence times, as in E., and mislocation noise. As in D, this leads to a spurious correlation at low speeds but no other significant effects.

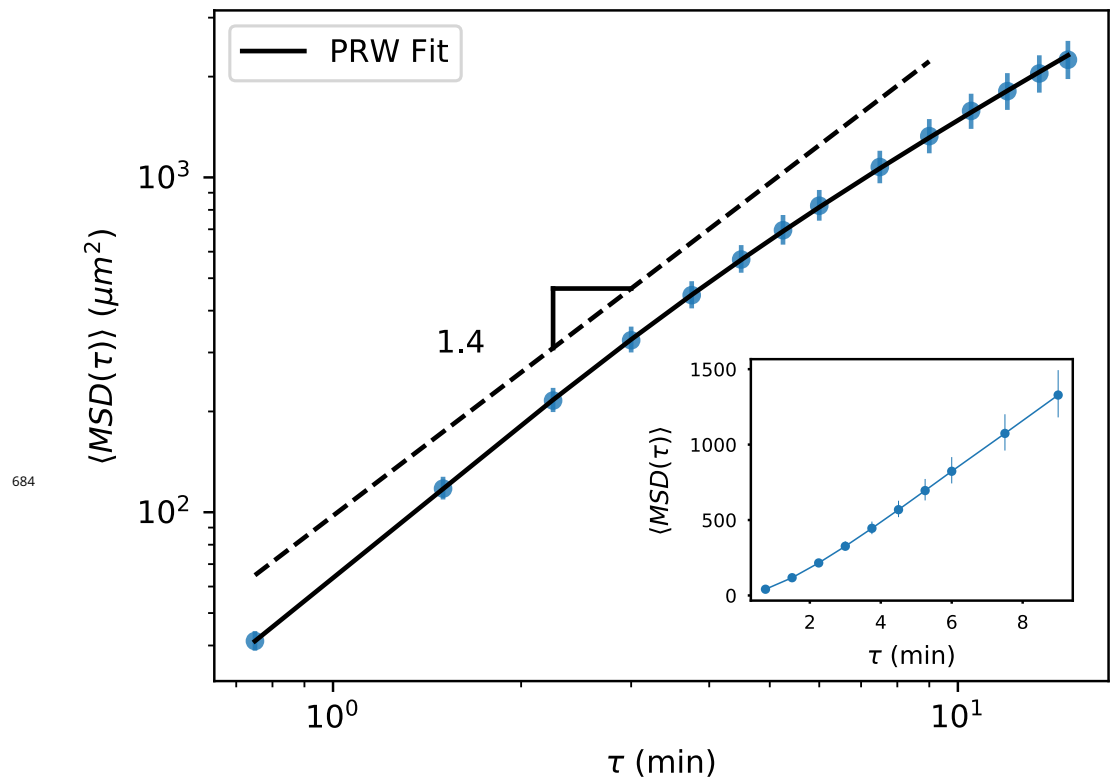

**Figure 1-Figure supplement 1.** MSD for all trajectories tracked through 15 minutes, including all measured time intervals ( $n=612$ ). As with the subset of longer trajectories, we observe a curved MSD consistent with a persistent random walk (PRW) model. Inset: linear scale through 10 minutes, showing a straight line consistent with diffusive behavior after the first few minutes. Error bars represent 95% confidence intervals on a bootstrap over trajectories.

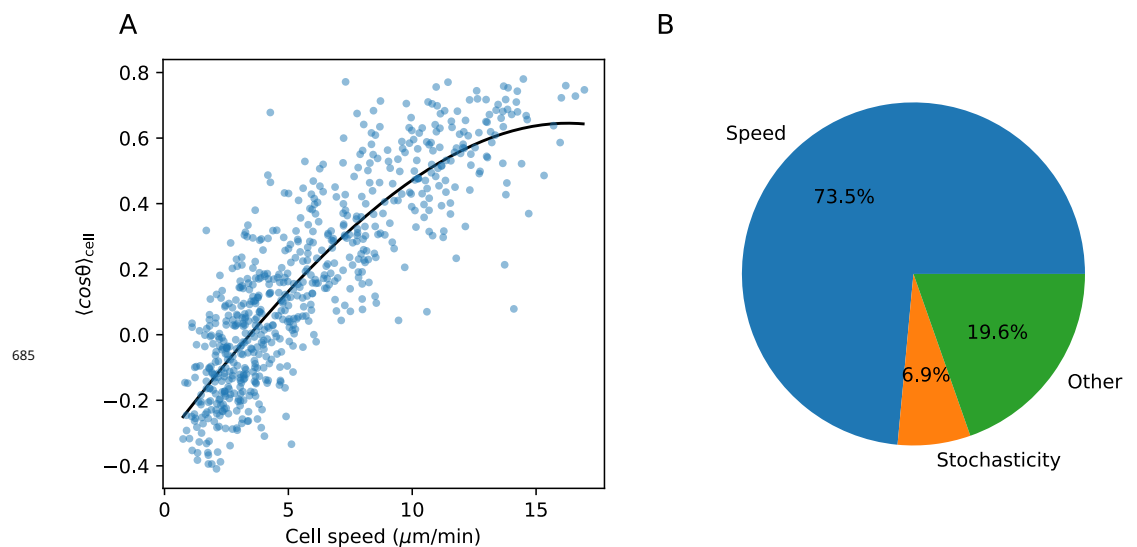

**Figure 3-Figure supplement 1.** A. Spline fit to speed-turn angle relationship. B. The fraction of the variance in the turn angle summary statistic explained by speed (estimated based on the spline fit in A.), by stochasticity, i.e. variance within a trajectory; and by other factors, which may include imperfections in the spline fit (see Materials and Methods).

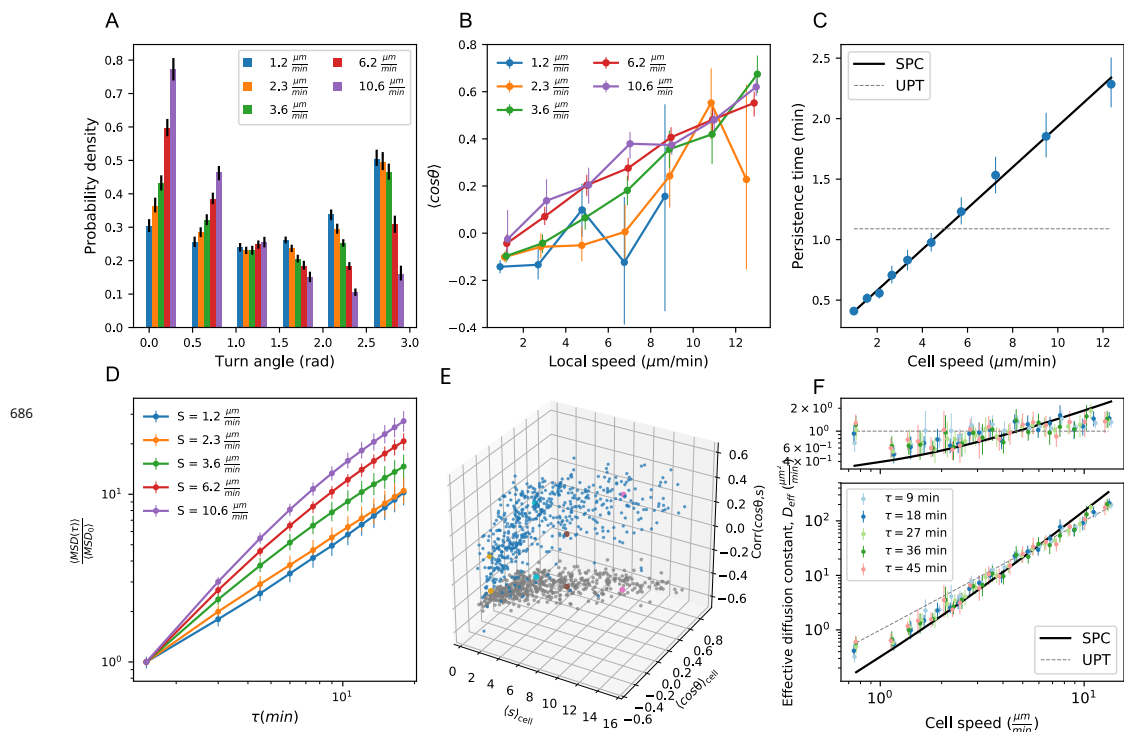

**Figure 4-Figure supplement 1.** Panels A,B,D,E as in **Figure 3A-D**; Panels C,F as in **Figure 4A-B**; with all statistics re-calculated based on sub-sampling timepoints by a factor of 2.

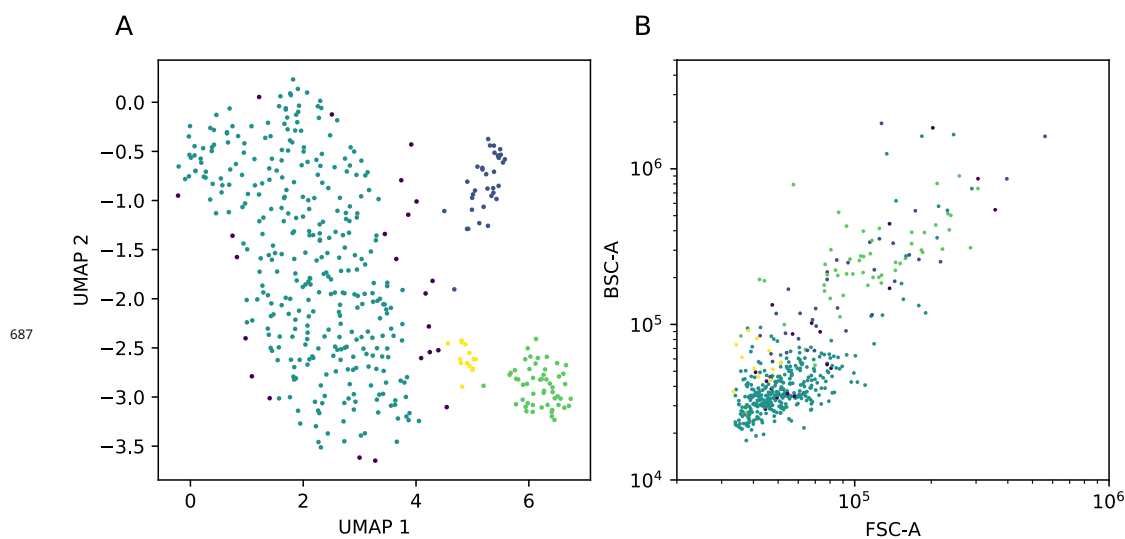

**Figure 5-Figure supplement 1.** A. UMAP dimensional reduction of cell gene expression profiles from scRNAseq, with clusters assigned by HDBSCAN (colors). B. Index sort data of FSC/BSC for these cells (colors correspond to cluster assignments from A).



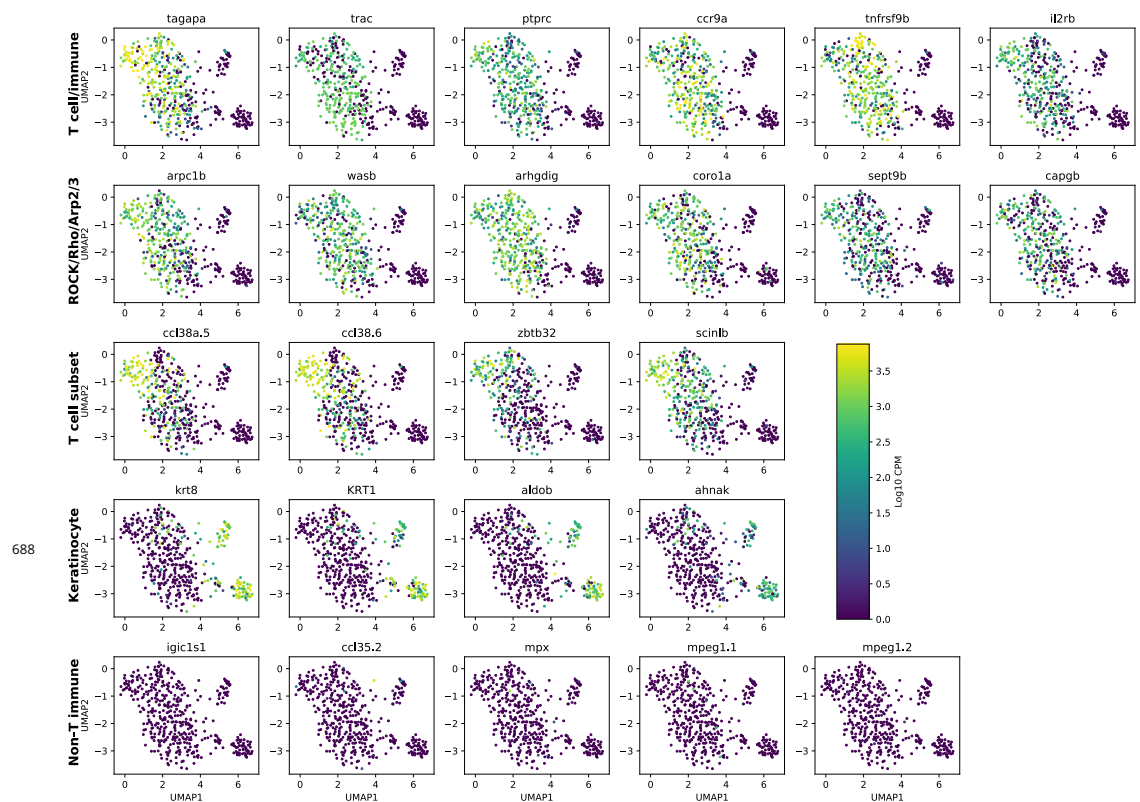

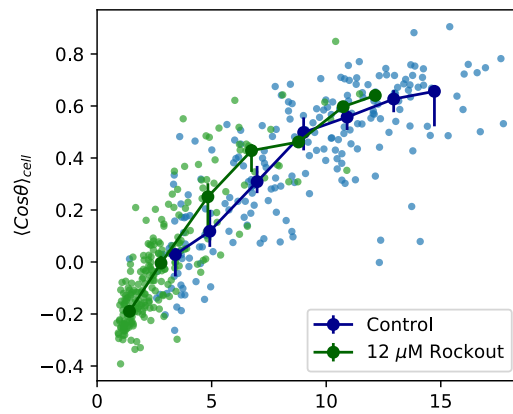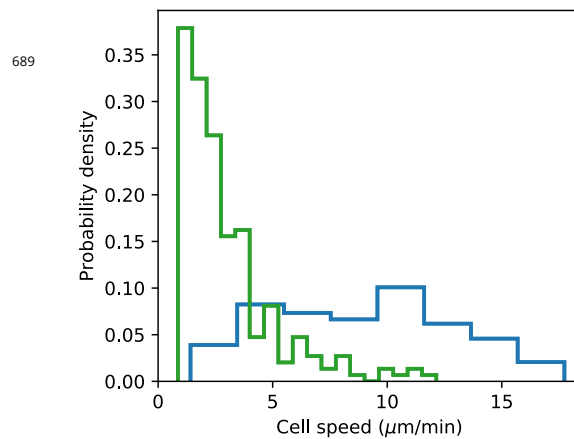

**Figure 5–Figure supplement 3.** As in **Figure 5C-D**, but including only those control samples with a paired Rockout treatment sample ( $n=6$  fish). Fish were imaged for 2.5 hours, and imaging media was replaced with media containing Rockout. Imaging over the same field of view was continued for 2.5 hours.
